# Supplementary material
Source: PubMed Central journal article supplement (PMC4386351)
Supplement: pnas.1421865112.sapp.pdf [file pnas.1421865112.sapp.pdf]

## SI Appendix

### Supplementing Results and Discussion

#### Sequence dataset specification

We obtained 1,486,735 bacterial and 796,544 archaeal sequences (Table S2) and 174,820 bacterial and 16,896 archaeal operational taxonomic units at 97% sequence identity level ( $OTU_{0.03}$ ).  $OTU_{0.03}$  that occurred only once in the whole dataset are termed absolute single sequence  $OTU_{0.03}$  ( $SSO_{abs}$ ) (1).  $OTU_{0.03}$  that occurred only once in at least one sample, but are more frequent in other samples are termed relative single sequence  $OTU$  ( $SSO_{rel}$ ) (1). The archaeal dataset contained 55%  $SSO_{abs}$  and 19%  $SSO_{rel}$  and the bacterial dataset contained 58%  $SSO_{abs}$  and 22%  $SSO_{rel}$ . Richness estimates and the number of  $SSO_{rel}$  per sampling site (Table S1) were similar to values reported before in local studies of benthic habitats (1, 2). To test the quality of the dataset we compared our results to those of previous studies. The relative sequence abundance of all ANME clades matched well with relative sequence abundances obtained by 16S rRNA gene libraries and relative cell abundances determined by fluorescence *in situ* hybridization (FISH) (Table S11). Thus, the considerations based on the 454 data may be extended to the *in situ* abundance of ANME clades.

#### Methane seeps enhance seafloor biodiversity

##### *Microbial richness and evenness of seafloor ecosystems*

With a value of D close to 1, archaeal diversity was extremely low at some methane seeps and hydrothermal vents, i.e. the gas- and mud-emitting Håkon Mosby mud volcano (HMMV;  $D=1.2$ ) and the Lost City hydrothermal vents (LC2, LC4;  $D=1.4$ ); it was highest in intertidal microbial mats of the North Sea coast (MM3;  $D=64$ ). Bacterial diversity was also lowest at seeps and vents, i.e. at a chimney of the Lau Vent Field (LV5;  $D=3.9$ ), and at an extinct methane seep in Antarctica (ANT;  $D=4.5$ ). It peaked in deep-sea surface sediments in the southeast Pacific off New Zealand (NZS9;  $D=719$ ). Across all benthic ecosystems, archaeal diversity was lower than bacterial diversity, as previously observed for other microbiomes, e.g. of subglacial sediments (3). On average archaeal S, Chao1 and D were, respectively, 4-, 6- and 15-fold lower than that of bacteria.

The wide span of microbial diversity observed across all seep sites is best explained by differences in local heterogeneity. Low-diversity methane seep communities were predominantly found in deep sediment layers of seeps (DS; Fig. 2A), at seeps overlaid by

anoxic waters (BS) or hot seeps (GB) where the number of niches available to microbes is reduced (4, 5), and/or the pool of colonists to select from is smaller. Complex seep communities tended to be associated with productive ocean regions at depths of 400-1000 m, and with the presence of rich animal communities (e.g. QS, GoM, NZ, HR). Interestingly, although relatively few bacterial and archaeal taxa are capable of metabolizing methane directly, we showed that the overall microbial community diversity sustained at seeps is high, and different from that of the surrounding seafloor and hydrothermal vents.

#### *Microbial community similarity between seafloor ecosystems*

Community dissimilarity was lowest in deep-sea surface sediments, which shared a high proportion of bacterial taxa (Fig. 2B/C; Table S1, S4). As an example, two samples from methane seeps of the same region at Guaymas Basin (GB1 and GB2) were less similar in community structure than deep-sea sediments from different hemispheres (NZS and SMS), or sands from a Hawaiian coral reef and the North Sea (e.g. CR2 and MM3).

We tested the differences between seafloor ecosystems using random subsampling and permutation-based Redundancy Analysis (RDA;  $N_{\text{test}}=10$ ,  $p_{\text{threshold}}<0.05$ ) including correction for false positives (6). All seafloor ecosystems were significantly different from each other using pairwise comparisons of either archaeal or bacterial communities. In addition, we tested whether cold-temperature methane seeps, hot methane seeps and SMTZ were significantly different from each other. Indeed, for nearly all tested combinations both the archaeal and bacterial community structures differed significantly. Only the bacterial communities of SMTZ were not significantly different from those of hot and cold seeps, confirming earlier observations (7).

#### *Microbial community composition of seafloor ecosystems*

Indicator taxa for each ecosystem (Table S5) were calculated based on the relative frequency of occurrence and relative abundance (8). Lau Vent Field samples (LV1-6) stood out due to the occurrence and high sequence abundance of *Epsilonproteobacteria*, which can be explained by their role in sulfide oxidation under different environmental conditions (9). Deep-sea surface sediments (NZS, SMS) in our study were characterized by the presence of *Gemmatimonadetes* and *Acidobacteria*, consistent with previous findings (10). Heterotrophic *Bathyarchaeota* (formerly Miscellaneous Crenarchaeotic Group) (11, 12) and *Chloroflexi* (13) are typical for organic-rich subsurface ecosystems. *Methanomicrobia* and *Deltaproteobacteria* as well as candidate divisions Hyd24-12 and JS1 (Fig. 3) were typical for methane seeps.

In addition, we found other core microbial clades at methane seeps with unknown function. These clades included *Thermoplasmatales*, which were shown to comprise methane-metabolizing organisms (14), and *Firmicutes* that include sulfate reducers (15). The *Spirochaetes* may be favored at sulfide-rich methane seeps, since they contain sulfide-oxidizers that live in consortia with sulfate-reducing bacteria (16). Organisms of candidate division JS1 were present at all sites and constituted the dominant clade at some hot seeps (GB) and all deep mud volcano sediments (DS) (Fig 3; Fig. S5B). JS1 is also widespread in subsurface methane hydrates and organic-rich shelf sediments (17), indicating an overlap between the communities of these ecosystems. JS1 organisms are suspected to be syntrophic acetate oxidizers (18) involved in the methane-derived carbon cycle at seeps (19). In contrast to a previous study (20) we found that JS1 correlated negatively with deltaproteobacterial SRB (Spearman's rank correlation  $R=-0.49$ ,  $p<0.01$ ).

### **Environmental selection at methane seeps**

On order level the available parameters sediment temperature, sediment depth, water depth, methane concentration, and space explained 16% ( $p=0.018$ ) of the archaeal and 10% ( $p=0.049$ ) of bacterial community variation. The archaeal community at methane seeps was shaped mainly by sediment temperature (RDA;  $p_{\text{Order}}=0.01$ , Figure S5A), whereas the bacterial community was shaped mainly by sediment depth ( $p_{\text{Order}}=0.02$ , Figure S5B). Compared to other global sampling efforts targeting microbial community assemblages, these numbers represent a large amount of explained variation. For comparison, 15 environmental parameters explained 11% of bacterial community variation in a subtropical river (21) and 12 environmental factors were needed to explain 44% of the variance in relative abundance of a single bacterial genus in soil (22). Unfortunately, no data were available for other relevant environmental factors previously found to structure microbial diversity at seeps, such as microbial interactions (23), faunal activity (24, 25) and stability of the seafloor system (26).

## Supplementing Material and Methods

### Primers used for amplification of the 16S rRNA V6 region

Archaeal forward primer (958F):

AATTGGANTCAACGCCGG

Archaeal reverse primers (1048R major/minor):

CGRCGGCCATGCACCWC

CGRCRGCCATGYACCWC

Bacterial forward primers (967F):

CTAACCGANGAACCTYACC

CNACGCGAAGAACCTTANC

CAACGCGMARAACCTTACC

ATACGCGARGAACCTTACC

Bacterial reverse primers (1046R):

CGACAGCCATGCANACCT

CGACAACCATGCANACCT

CGACGGCCATGCANACCT

CGACGACCATGCANACCT

The primers originate from the International Census of Marine Microbes (ICoMM), for further details see (27, 28) (<http://vamps.mbl.edu/resources/prim.php>).

### Sequence processing routine

Processing of the 454 pyrosequencing amplicons was performed according to the following routine modified from Pat Schloss (29).

Step 1 - Extract data from binary file

```
sffinfo(sff=Data.sff, flow=T)
```

Step 2 – Separate flowgrams

```
trim.flows(flow=Data.flow, oligos=Data.oligos, pdiffs=2, bdiffs=1, processors=16)
```

Step 3 – Reducing sequencing error using a method based on PyroNoise (30)

```
shhh.flows(file=Data.flow.files, processors=16)
```

Step 4 - Concatenate single files to make one file containing all samples:

```
cat *.trim.shhh.fasta > AllArch.fasta
```

```
cat *.trim.shhh.names > AllArch.names
```

```
cat *.trim.shhh.groups > AllArch.groups
```

Step 5 - Trim sequences using minlength=75 (for bacteria), 80 (for archaea):  
trim.seqs(fasta=All.fasta,name=All.names,oligos=Data.oligo,pdiffs=1,bdiffs=0,maxhomop=8,minlength=80,flip=F,processors=16)

Step 6 - Find unique sequences:  
unique.seqs(fasta=All.trim.fasta, name=All.trim.names)

Step 7 - Align sequences:  
align.seqs(fasta=All.trim.unique.fasta, reference=silva.archaea.fasta, processors=16) #for  
bacteria use (silva.bacteria.fasta)

Step 8 - Screen sequences:  
screen.seqs(fasta=All.trim.unique.align,name=All.trim.names,group=All.groups,optimize=start-end,criteria=90)

Step 9 - Filter dataset:  
filter.seqs(fasta=All.trim.unique.good.align, vertical=T, trump=., processors=16)

Step 10 - Simplify the dataset:  
unique.seqs(fasta=All.trim.unique.good.filter.fasta, name=All.trim.good.names)

Step 11 – Preclustering based on single-linkage preclustering (31)  
pre.cluster(fasta=All.trim.unique.good.filter.unique.fasta,name=All.trim.unique.good.filter.names,group=All.good.groups,diffs=0)

Step 12 - Chimera check using uchime (32):  
chimera.uchime(fasta=All.trim.unique.good.filter.unique.precluster.fasta,name=All.trim.unique.good.filter.unique.precluster.names,group=All.good.groups,processors=16)

Step 13 - Chimera removal:  
remove.seqs(accnos=All.trim.unique.good.filter.unique.precluster.uchime.accnos,fasta=All.trim.unique.good.filter.unique.precluster.fasta,name=All.trim.unique.good.filter.unique.precluster.names,group=All.good.groups)

Step 14 - Classify sequences:  
classify.seqs(fasta=All.trim.unique.good.filter.unique.precluster.pick.fasta,template=nogap.archaea.fasta,taxonomy=silva.archaea.silva.tax) # for bacteria use (nogap.bacteria.fasta,taxonomy=silva.bacteria.silva.tax)

Step 15 - Remove lineages:  
remove.lineage(fasta=All.trim.unique.good.filter.unique.precluster.pick.fasta,name=All.trim.unique.good.filter.unique.precluster.pick.names,group=All.good.pick.groups,taxonomy=All.trim.unique.good.filter.unique.precluster.pick.silva.taxonomy,taxon=Bacteria) # or remove Eukarya/Archaea

Step 16 - Simplify names:  
system(cp All.trim.unique.good.filter.unique.precluster.pick.silva.pick.taxonomy All.taxonomy)  
system(cp All.trim.unique.good.filter.unique.precluster.pick.pick.fasta All.fasta)  
system(cp All.trim.unique.good.filter.unique.precluster.pick.pick.names All.names)  
system(cp All.good.pick.pick.groups All.groups)

Step 17 - Distance matrix:

```
dist.seqs(fasta=All.fasta, cutoff=0.15, processors=16)
```

Step 18 - Cluster:

```
cluster(column=All.dist,name=All.names)
```

Step 19 - Get data for 0.03:

```
make.shared(list=All.an.list, group=All.groups, label=0.03)
```

Step 20 - Normalize the number of sequences in each sample:

```
count.groups() # subsample according to the smallest group size
```

```
sub.sample(shared=All.an.shared, size=3000)
```

Step 21 - Consensus taxonomy for each OTU:

```
classify.otu(list=All.an.list, name=All.names, taxonomy=All.taxonomy, label=0.03, cutoff=80)
```

Step 22 - OTU-based analysis Alpha diversity:

```
collect.single(shared=All.an.0.03.subsample.shared, calc=sobs-chao-invsimpson, freq=100)
```

```
summary.single(shared=All.an.0.03.subsample.shared, calc=nseqs-coverage-sobs-invsimpson)
```

## Data analyses

The original subsampled sequence abundance tables were used to calculate Inverse Simpson diversity indices (33) and Chao1 richness (34) using *mothur* v24. Dissimilarities between all samples were calculated using the Bray-Curtis dissimilarity coefficient (i.e. relative sequence abundance) (35). The resulting beta-diversity matrices were used for 2-dimensional non metric multidimensional scaling (NMDS) ordinations with 20 random starts (36). Stress values below 0.2 indicate that the multidimensional dataset is well represented by the 2D ordination. To test whether the inclusion of singletons affected further statistical tests we generated NMDS ordinations with and without absolute singletons ( $SSO_{abs}$ ) and compared them using Procrustes correlation analysis (37). The correlation of the two archaeal (Procrustes correlation coefficient=0.999,  $p=0.001$ ) and the two bacterial ordinations (0.998,  $p=0.001$ ) was highly significant, meaning that the presence of  $SSO_{abs}$  did not affect the overall trend. Thus we decided to include the singletons in our analyses, to be able to identify types of microorganisms which can switch from rare to dominant modes of distribution. Taxa that were shared between ecosystems and samples were calculated using the Jaccard dissimilarity coefficient (i.e. presences absence). RDA (Redundancy Analyses) based on Hellinger transformed  $OTU_{0.03}$  datasets (38) were carried out to evaluate the combined effects of sediment depth, sediment temperature, water depth and ranges of methane and sulfate concentrations on the microbial community composition in methane seep habitats. The significance of combined and pure effects was assessed by analysis of variance (ANOVA). Indicator taxa of the different seafloor microbiomes were calculated based on relative abundance tables (8). Distance decay was based on pairwise community dissimilarities using the Sørensen index and assessed in a logarithmic transformed space to enhance the linear fitting (39). Log-transformations were done using the natural logarithm, which gives the same results than  $\log_{10}$  transformations (40). Because some values were zero in the similarity and distance tables, a small value (0.01) was added before log-transformation (41). The significance of  $\beta$  was tested by 1000 Monte Carlo permutations of the residuals under the full regression model (38). The network was based on presence absence tables. The network vertices (nodes) were plotted using a Fruchterman and Reingold force-directed algorithm (42), which causes an increase in the nodes attraction to each other with increasing similarity between them. For our dataset, it means that the more  $OTU_{0.03}$  two samples share, the closer they are placed in the network. All analyses were carried out with the R statistical environment and the packages *vegan* (43), *labdsv* (44), *gmt* (45), *network* (46), and with custom R scripts.

## Supplementing Figures

Figure S1

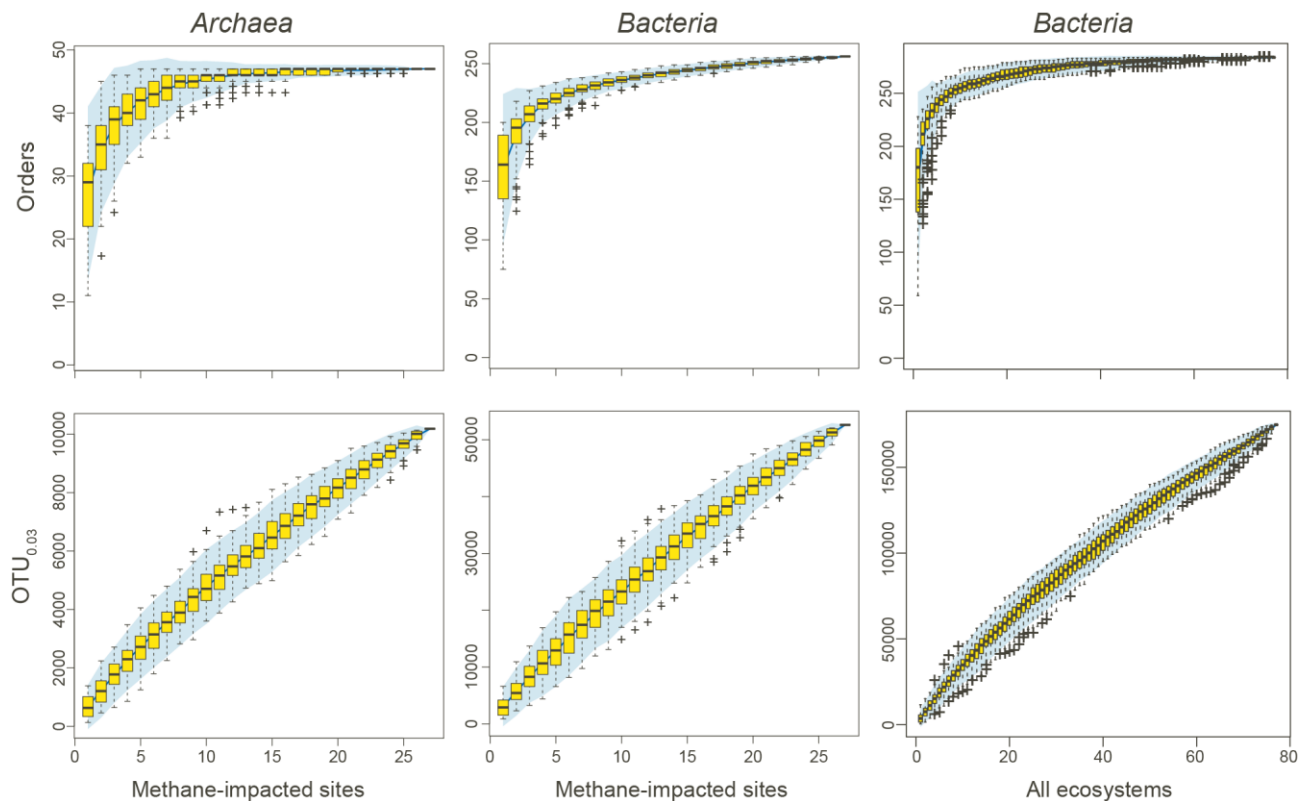

**Figure S1: Species accumulation curves of *Archaea* and *Bacteria***

Species accumulation curves based on archaeal (left) and bacterial (middle) orders (upper panel) and OTU<sub>0.03</sub> (lower panel) detected at the 27 methane-impacted ecosystems (23 methane seeps and 4 SMTZ); as well as for bacterial orders and OTU<sub>0.03</sub> (right) for all 77 investigated ecosystems. The boxplots show a summary of 100 permutations that were calculated for each point using Chao1 richness and random subsampling. The blue area depicts the 95% confidence interval. Extrapolation of species richness using the Chao1 estimator based on the whole dataset indicated that around 361,000 ± 1,500 (± SEM) bacterial and 33,000 ± 470 archaeal OTU<sub>0.03</sub> inhabit the investigated seafloor habitats.



Figure S2

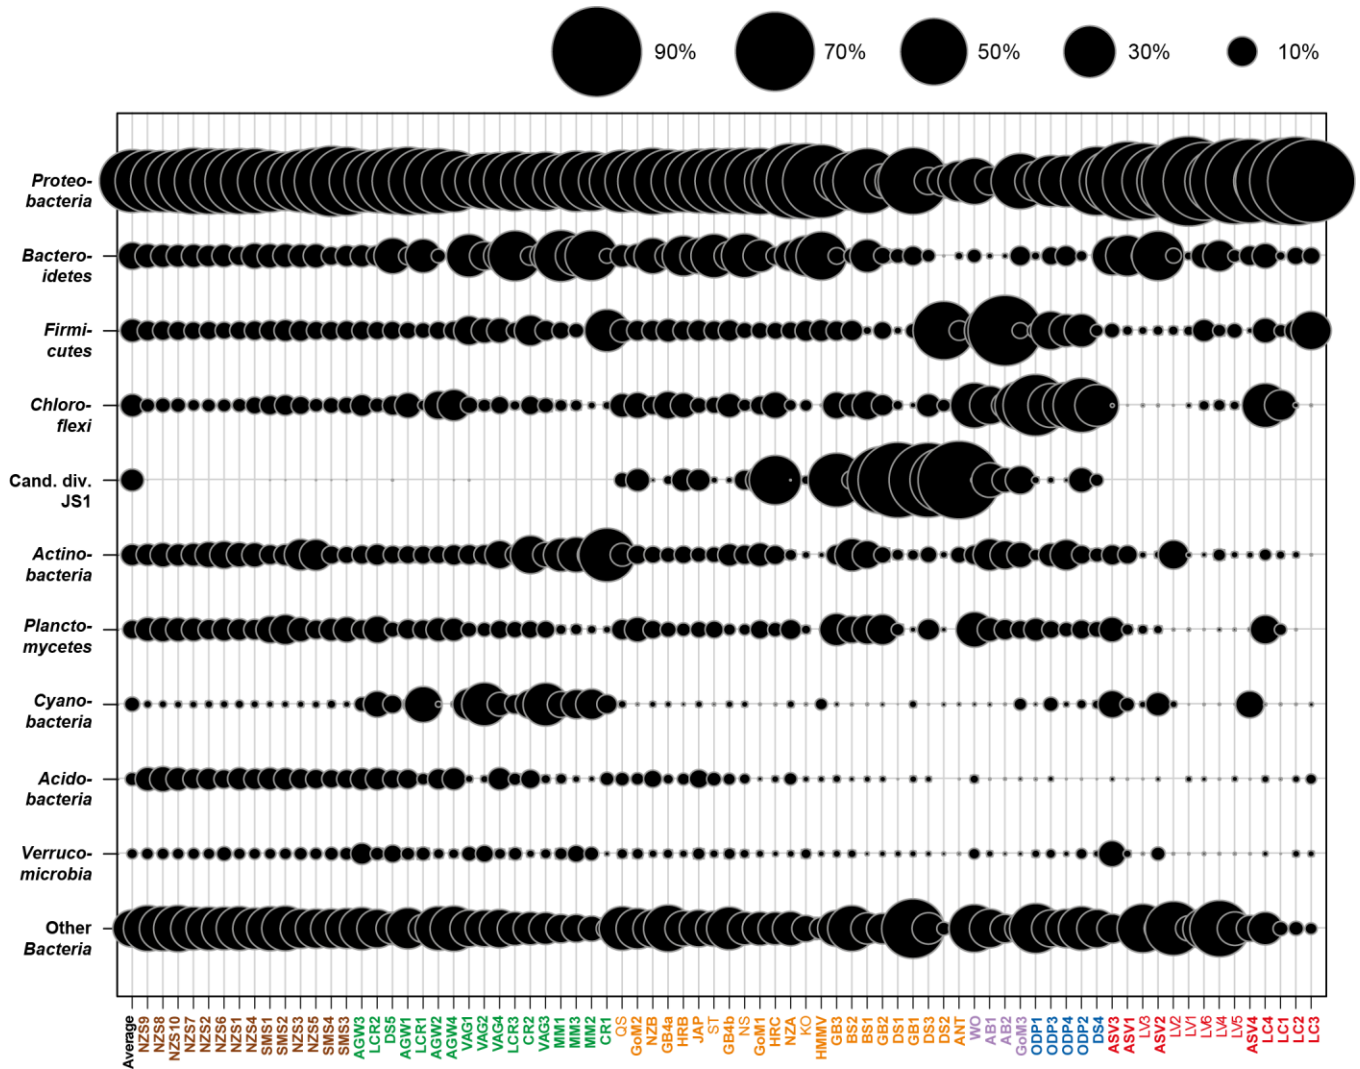

Figure S2: Relative abundance of bacterial phyla

Seven of the ten phyla were cosmopolitan. Candidate division JS1 basically occurred only at methane seeps, SMTZ and in the subsurface. *Acidobacteria* were detected in all, but two samples (DS2, LV2) and *Planctomycetes* were detected in all, but one sample (LC3).

Figure S3

A

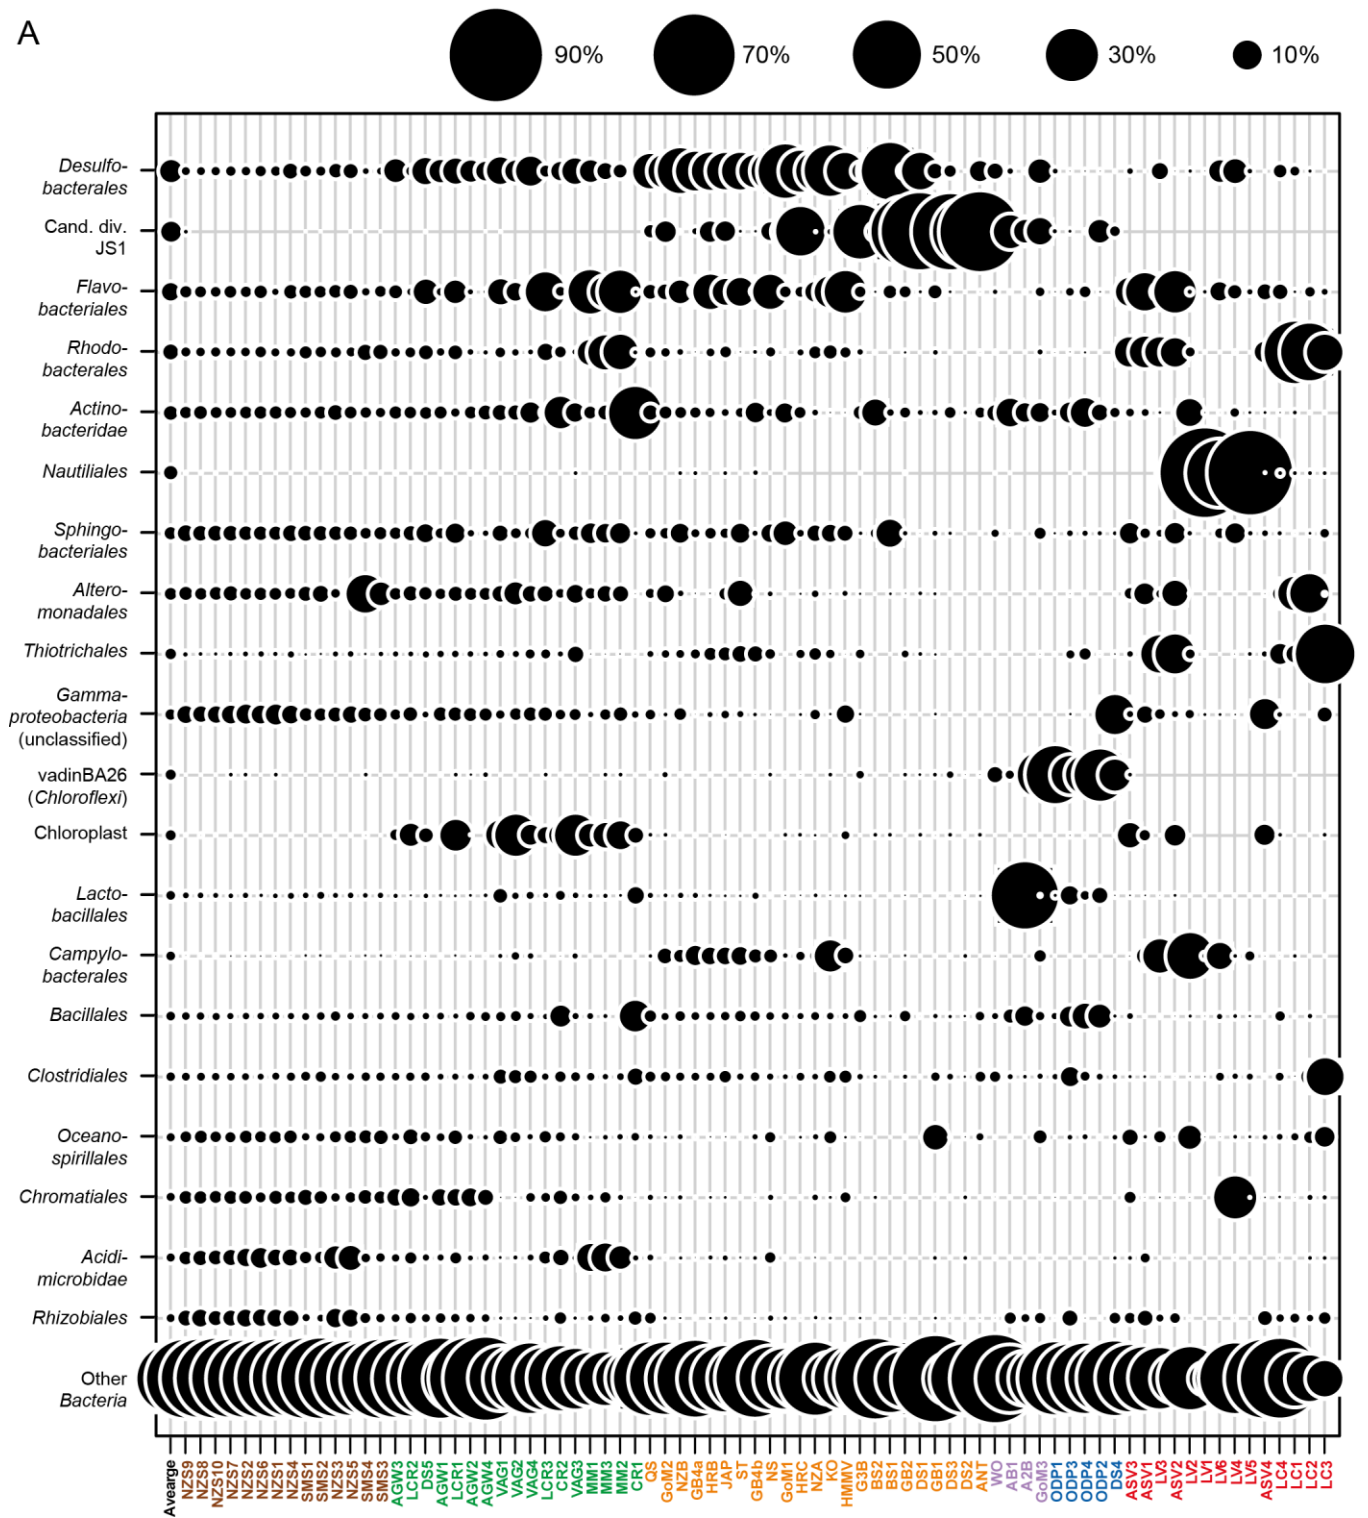

**Figure S3**

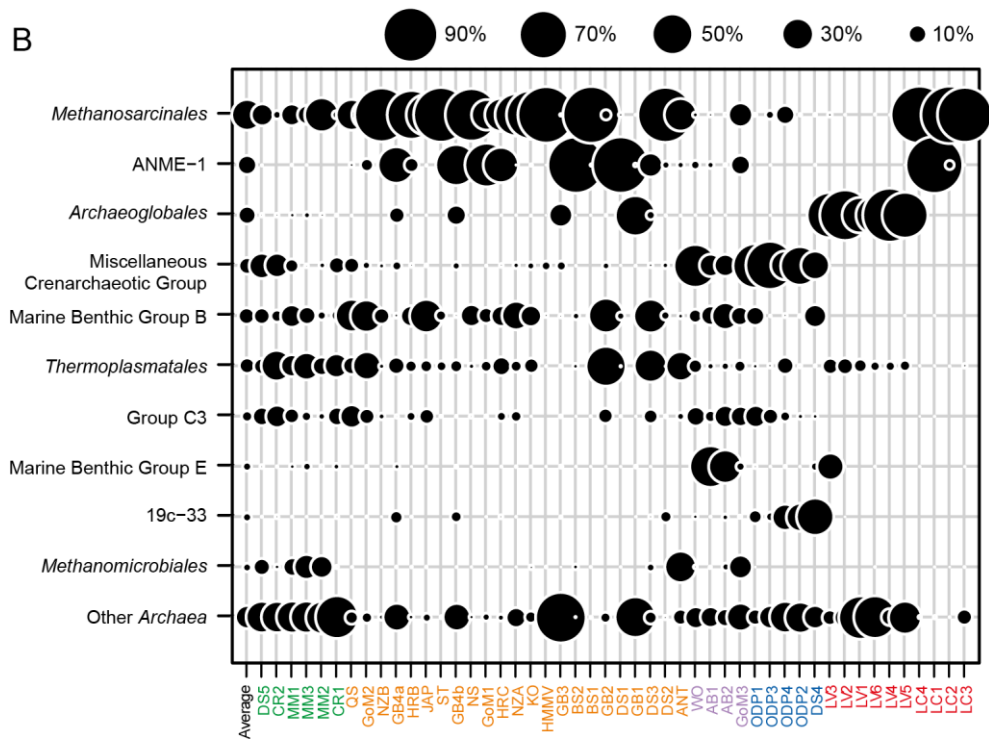

**Figure S3: Relative abundance of bacterial and archaeal orders**

Relative sequence abundances of bacterial (A) and archaeal orders (B) at all investigated sites.

**Figure S4**

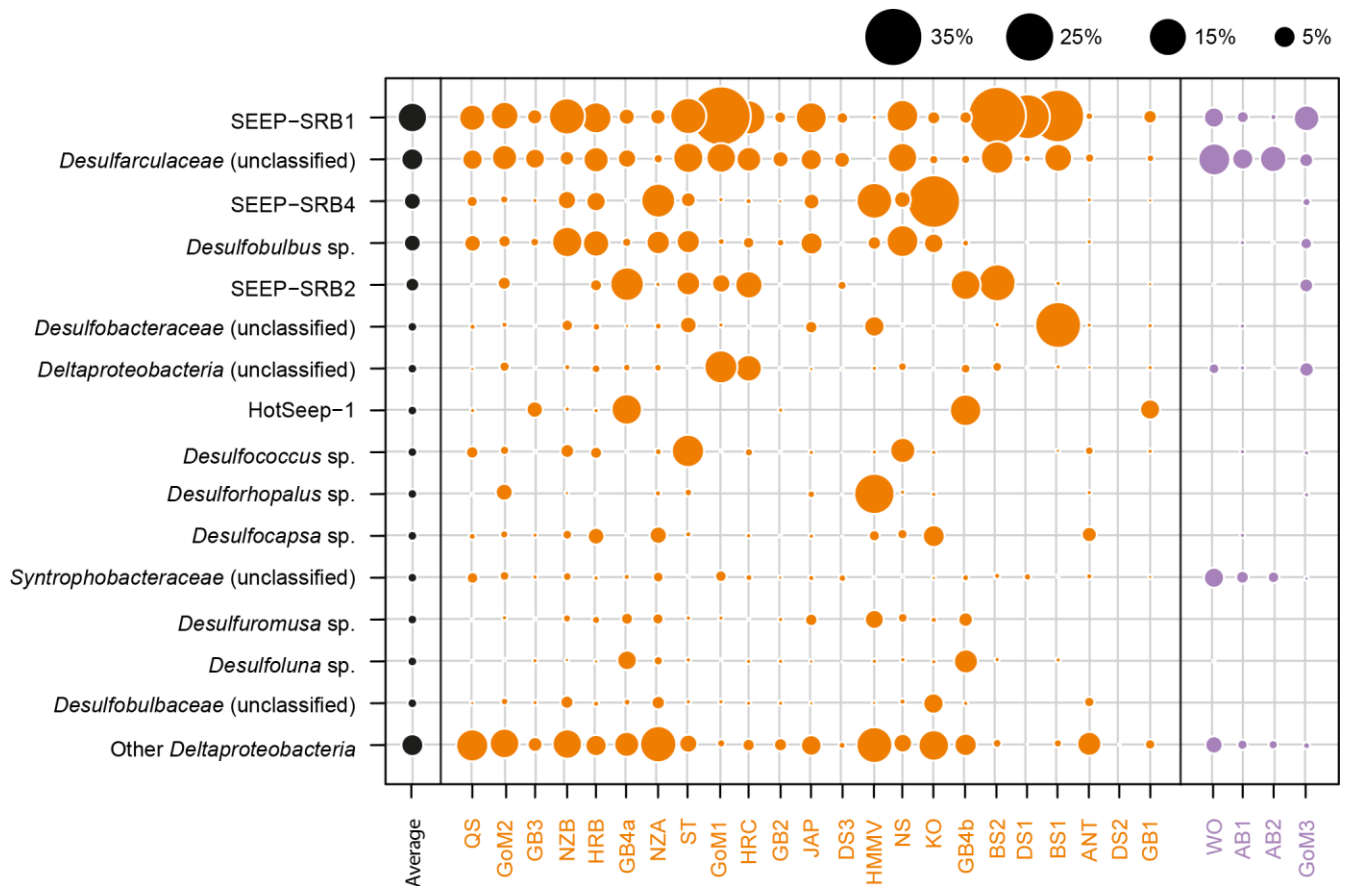

**Figure S4: Relative abundance of Deltaproteobacteria and HotSeep-1**

Most methane-rich sites were dominated by SEEP-SRB1 (*Desulfobacteraceae*), which are known to form consortia with the ANME-2 clade (47). Other ANME partner SRB include SEEP-SRB2 (48) and HotSeep-1 from Guaymas Basin hydrothermal sediments (49). *Desulfarculaceae* and SEEP-SRB4 (*Desulfobulbaceae*) both frequently occur at seep ecosystems, but were not shown to aggregate with ANME. The taxonomic classification of deltaproteobacterial subgroups is based on SILVA (release 119, 07-2014; (50)).

Figure S5

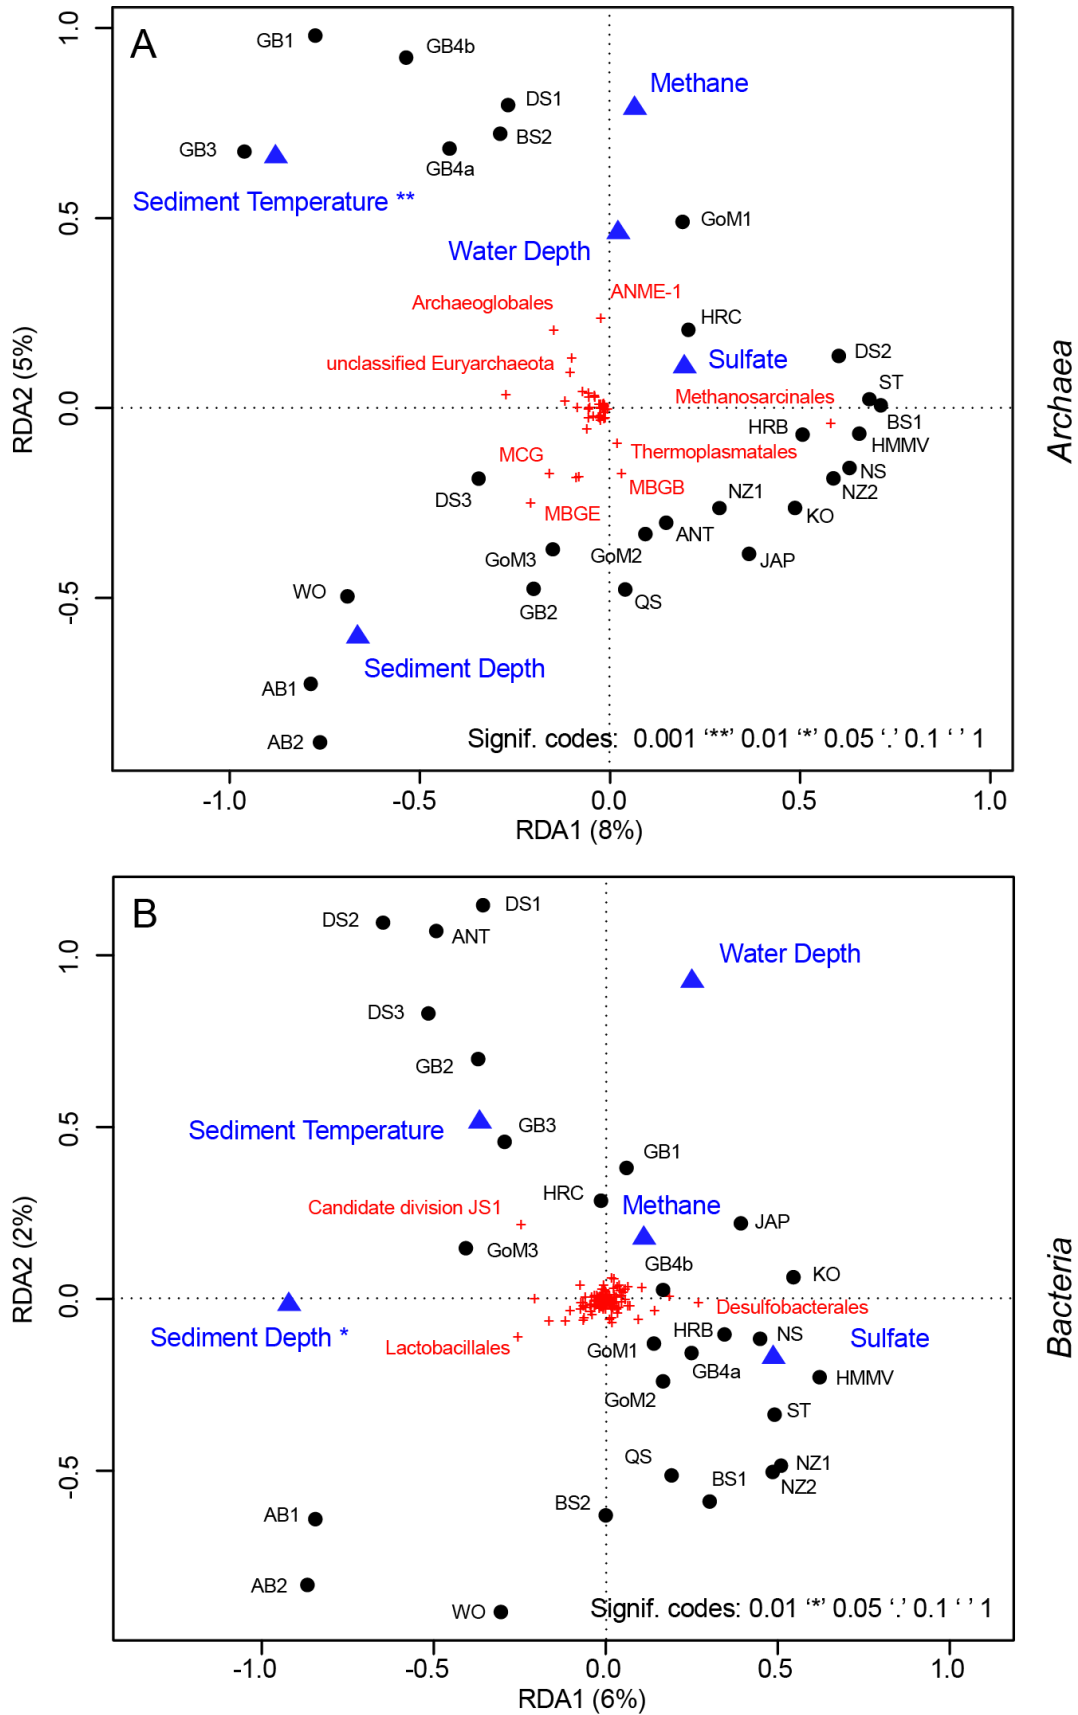

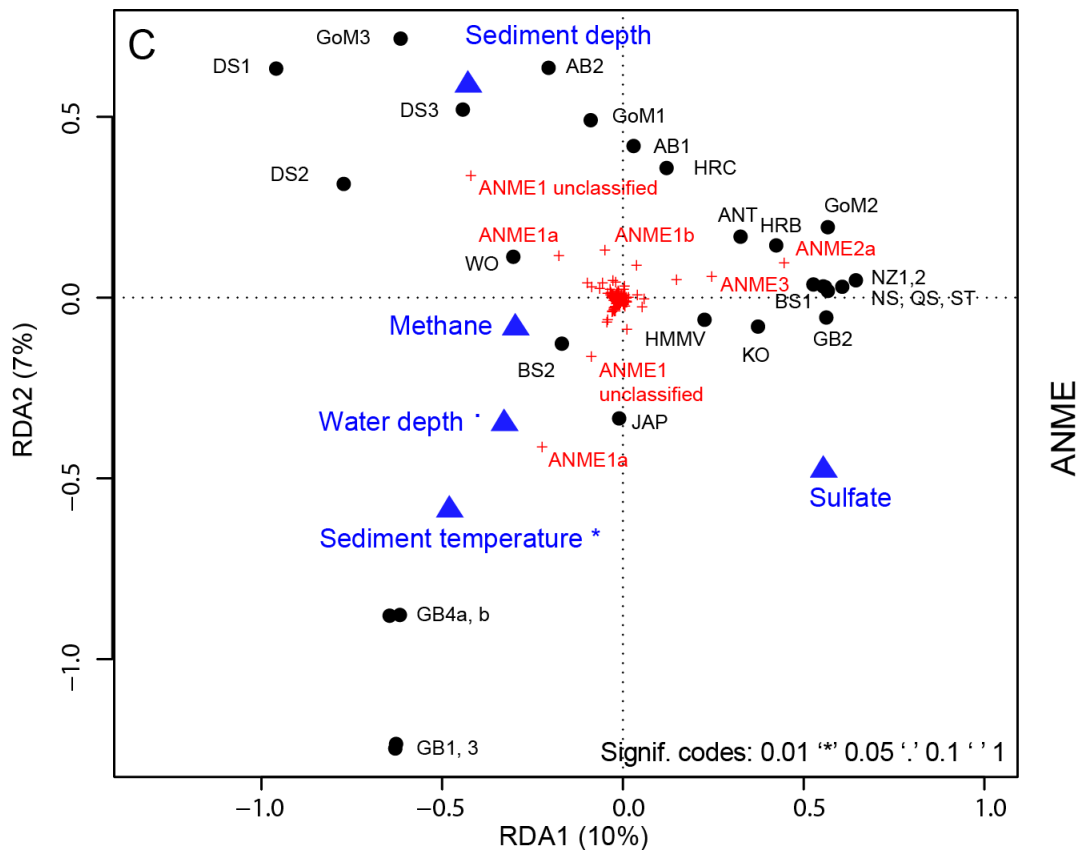

**Figure S5: Redundancy analysis of archaeal and bacterial diversity**

Redundancy analysis (RDA) using the relative abundance of archaeal orders (A), bacterial orders (B) and ANME OTU<sub>0.03</sub> (C), and five environmental parameters of 27 methane-impacted ecosystems (23 methane seeps and 4 SMTZ). The plots show the full model considering all five parameters, which was highly significant in all cases. Black circles represent the microbial community of a given sample, environmental parameters are fitted to the ordination and represented as blue triangles. Microbial orders or OTU<sub>0.03</sub> are depicted as red crosses. Note: In RDA plots environmental parameters and species are generally shown as centered arrows originating in point 0/0 (which represents the average and not zero). To simplify the plot we show the tips of the arrows as blue triangles or red crosses. Significance levels (marked by asterisks) were calculated for each parameter on its own using partial RDA.

Figure S6

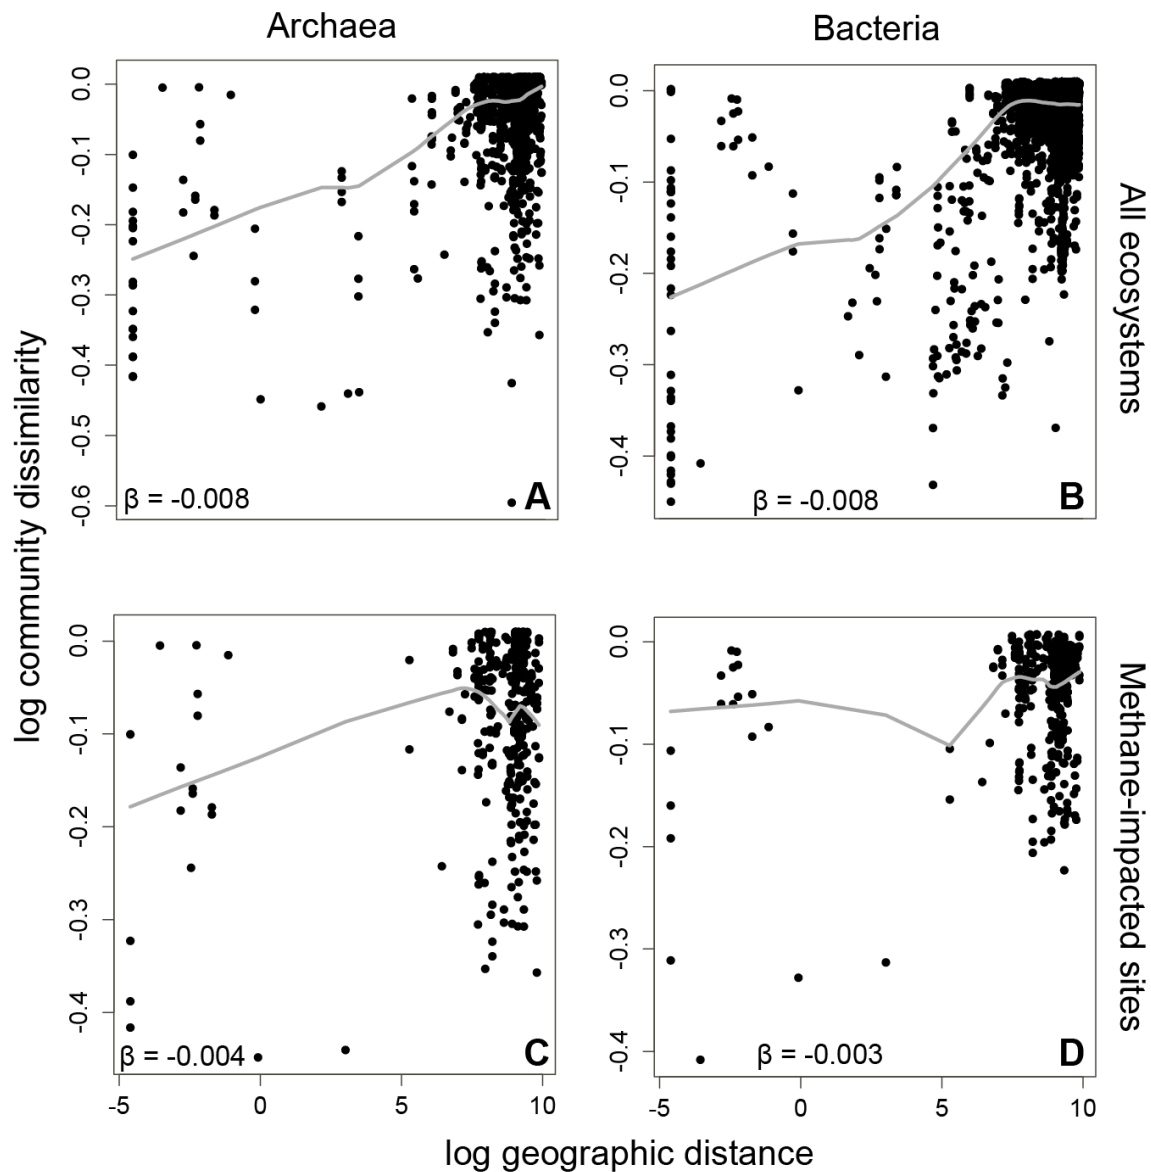

**Figure S6: Distance decay of microbial community similarity**

Distance decay (DD) of community similarity was calculated based on geographic and community distance matrices. The plots show decreasing microbial community similarity (from top to bottom; y-axis) with increasing geographic distance (from left to right; x-axis). (A) and (C) show archaeal communities, (B) and (D) bacterial communities. The global dataset is shown in (A) and (B), whereas AOM habitats (23 methane seeps and four SMTZ) are represented by (C) and (D). The regression was calculated using a linear model. The slope  $\beta$  of each regression was highly significant ( $p > 0.001$ ) as determined by ANOVA and 1000 permutations.

Figure S7

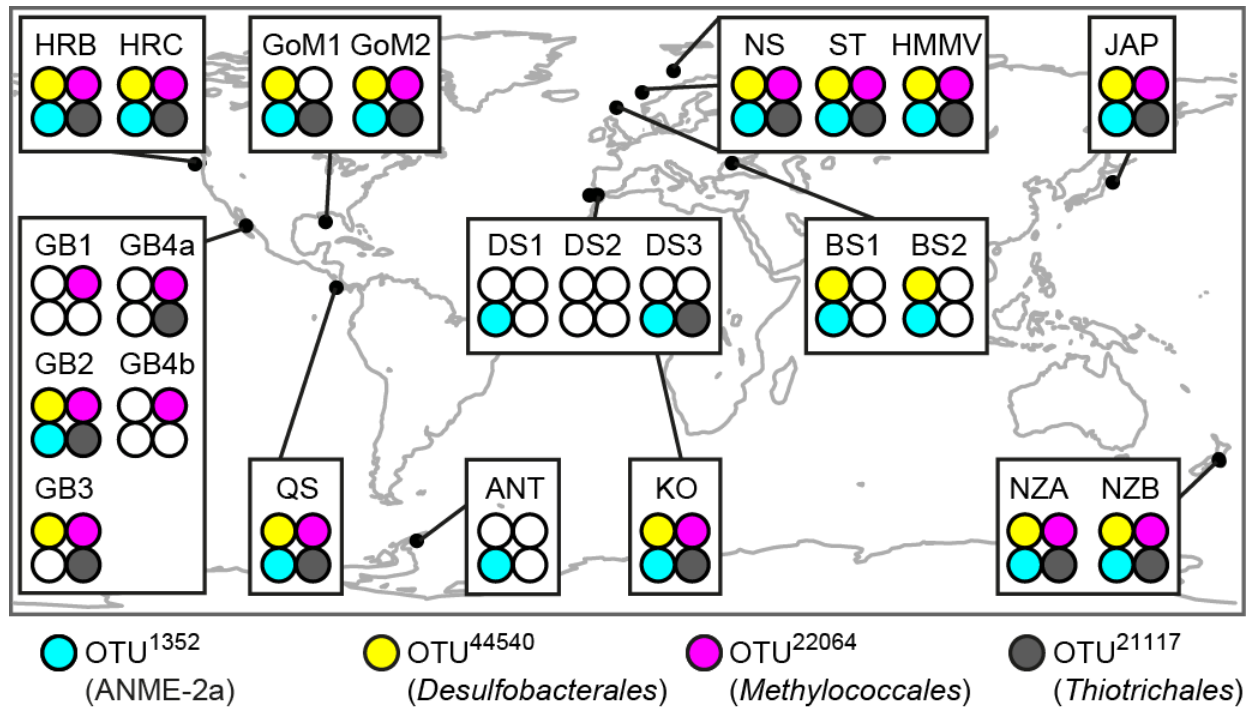

**Figure S7: Global occurrence of OTU<sub>0.03</sub> from key functional taxa**

The most widespread and also most sequence-abundant ANME OTU<sub>0.03</sub> belonged to clade ANME-2a and occurred at 18 of 23 cold seeps. The most widespread OTU<sub>0.03</sub> of sulfate-reducing *Desulfobacterales*, aerobic methanotrophic *Methylococcales* and sulfur-oxidizing *Thiotrichales* each occurred at 16 of 23 cold seeps. These four OTU<sub>0.03</sub> were present at basically all sites where methane, sulfate and oxygen were available and the temperature was around 4°C. At anoxic, sulfate-rich sites (BS1, 2) only the two anaerobic OTU<sub>0.03</sub> belonging to ANME and sulfate-reducing bacteria (SRB) were present. Sediments from Guaymas Basin that include warm (15-25°C; GB1-2) or even hot sites (> 50°C; GB3, GB4b) lacked these two OTU<sub>0.03</sub>. Here, AOM is carried out by thermophilic ANME and SRB (4). For the frequency of the top 10 OTU<sub>0.03</sub> from each of the four clades see Table S9.



Table S1: Characteristics of seafloor microbiomes

|          | Average Observed Richness (S) | Average Estimated Richness (Chao1) | Average Inverse Simpson Index (D) | Average SSOabs per sample (in %) | Average SSOrel per sample (in %) | Beta-dispersion ** | Most frequent class *** | Most frequent order ***        | Indicator class ****             | Domain contribution to S/Chao1 (in %) |       |
|----------|-------------------------------|------------------------------------|-----------------------------------|----------------------------------|----------------------------------|--------------------|-------------------------|--------------------------------|----------------------------------|---------------------------------------|-------|
| Bacteria | Deep-Sea Surface (14)*        | 1720                               | 6447                              | 445                              | 30                               | 34                 | 0.47                    | <i>Gamma-proteobacteria</i>    | <i>Alteromonadales</i>           | SAR202 ( <i>Chloroflexi</i> )         | n.a.  |
|          | Coastal Sediments (17)        | 1458                               | 4634                              | 247                              | 35                               | 26                 | 0.62                    | <i>Gamma-proteobacteria</i>    | <i>Flavobacteriales</i> #        | OPB35 #                               | 46/51 |
|          | Methane Seeps (23)            | 847                                | 2499                              | 87                               | 34                               | 24                 | 0.64                    | <i>Delta-proteobacteria</i>    | Candidate division JS1           | <i>Delta-proteobacteria</i>           | 74/77 |
|          | SMTZ (4)                      | 782                                | 2166                              | 87                               | 38                               | 18                 | 0.68                    | <i>Bacilli</i>                 | <i>Lactobacillales</i>           | GIF9 ( <i>Chloroflexi</i> )           | 56/66 |
|          | Subsurface (5)                | 750                                | 1585                              | 78                               | 35                               | 16                 | 0.52                    | vadinBA ( <i>Chloroflexi</i> ) | vadinBA26 ( <i>Chloroflexi</i> ) | vadinBA ( <i>Chloroflexi</i> )        | 83/83 |
|          | Hydrothermal Vents (14)       | 465                                | 1152                              | 28                               | 33                               | 21                 | 0.65                    | <i>Gamma-proteobacteria</i>    | <i>Nautiliales</i>               | <i>Epsilon-proteobacteria</i>         | 70/64 |
| Archaea  | Deep-Sea Surface (0)*         | n.a.                               | n.a.                              | n.a.                             | n.a.                             | n.a.               | n.a.                    | n.a.                           | n.a.                             | n.a.                                  | n.a.  |
|          | Coastal Sediments (6)         | 617                                | 1558                              | 46                               | 43                               | 14                 | 0.55                    | <i>Methanomicrobia</i> ##      | <i>Thermoplasmatales</i>         | Marine Group 1                        | 54/49 |
|          | Methane Seeps (23)            | 210                                | 492                               | 7.5                              | 28                               | 24                 | 0.62                    | <i>Methanomicrobia</i>         | <i>Methanosarcinales</i>         | <i>Methanomicrobia</i>                | 26/23 |
|          | SMTZ (4)                      | 305                                | 635                               | 13                               | 31                               | 19                 | 0.68                    | <i>Thermoplasmata</i>          | MBGE                             | SCG                                   | 44/34 |
|          | Subsurface (5)                | 130                                | 269                               | 7.0                              | 33                               | 18                 | 0.44                    | MCG                            | MCG                              | <i>Methanopyri</i>                    | 17/17 |
|          | Hydrothermal Vents (10)       | 119                                | 307                               | 4.2                              | 34                               | 20                 | 0.56                    | <i>Methanomicrobia</i>         | <i>Archaeoglobales</i>           | <i>Thermococci</i>                    | 30/36 |

SSOrel/abs: Relative/absolute single sequence OTU<sub>0.03</sub>

S, Chao1 and D were standardized based on resampling of 3000 sequences

n.a. not analyzed

\* Number of samples

\*\* Average within group dissimilarity based on distance to centroid, p<0.01 (permtest)

\*\*\* Based on relative 16S rRNA (V6) sequence abundance using pyrosequencing

\*\*\*\* Based on rel. abundance/rel. frequency of occurrence (8)

Taxonomic assignment based on SILVA release 102 (50)

SMTZ: Sulfate methane transition zone

# Chloroplast sequences targeted by the primers were originally the most frequent order and indicator class, but were discarded as they originate from algae and plants

## Methanomicrobia of coastal sands almost exclusively contained methanogens, Methanomicrobia of cold seeps were comprised of ANME

MCG: Miscellaneous Crenarchaeotic Group

Table S2: Diversity parameters of seafloor samples

| Sample * | Quality Reads |         | OTU <sub>0.03</sub> |         | OTU <sub>0.03</sub> ** |         | Inverse Simpson ** |         | Chao1 Richness ** |         |
|----------|---------------|---------|---------------------|---------|------------------------|---------|--------------------|---------|-------------------|---------|
|          | Bacteria      | Archaea | Bacteria            | Archaea | Bacteria               | Archaea | Bacteria           | Archaea | Bacteria          | Archaea |
| NZS9     | 33365         | n.a.    | 11671               | n.a.    | 1978                   | n.a.    | 719                | n.a.    | 8848              | n.a.    |
| NZS8     | 19900         | n.a.    | 8710                | n.a.    | 1980                   | n.a.    | 604                | n.a.    | 8409              | n.a.    |
| NZS10    | 28897         | n.a.    | 10157               | n.a.    | 1902                   | n.a.    | 600                | n.a.    | 8286              | n.a.    |
| NZS7     | 20901         | n.a.    | 7310                | n.a.    | 1821                   | n.a.    | 537                | n.a.    | 7681              | n.a.    |
| NZS2     | 25783         | n.a.    | 8483                | n.a.    | 1759                   | n.a.    | 412                | n.a.    | 6865              | n.a.    |
| NZS6     | 25882         | n.a.    | 7854                | n.a.    | 1667                   | n.a.    | 364                | n.a.    | 6317              | n.a.    |
| NZS1     | 17715         | n.a.    | 6348                | n.a.    | 1687                   | n.a.    | 371                | n.a.    | 6297              | n.a.    |
| NZS4     | 26337         | n.a.    | 8652                | n.a.    | 1713                   | n.a.    | 375                | n.a.    | 6078              | n.a.    |
| SMS1     | 27080         | n.a.    | 7926                | n.a.    | 1747                   | n.a.    | 521                | n.a.    | 5831              | n.a.    |
| SMS2     | 18150         | n.a.    | 6223                | n.a.    | 1704                   | n.a.    | 515                | n.a.    | 5571              | n.a.    |
| NZS3     | 20111         | n.a.    | 6223                | n.a.    | 1588                   | n.a.    | 399                | n.a.    | 5482              | n.a.    |
| NZS5     | 33401         | n.a.    | 8572                | n.a.    | 1530                   | n.a.    | 357                | n.a.    | 5268              | n.a.    |
| SMS4     | 21233         | n.a.    | 5551                | n.a.    | 1471                   | n.a.    | 179                | n.a.    | 4702              | n.a.    |
| SMS3     | 27652         | n.a.    | 6881                | n.a.    | 1532                   | n.a.    | 273                | n.a.    | 4620              | n.a.    |
| AGW3     | 23538         | n.a.    | 7333                | n.a.    | 1726                   | n.a.    | 338                | n.a.    | 6377              | n.a.    |
| LCR2     | 4701          | n.a.    | 2607                | n.a.    | 1869                   | n.a.    | 526                | n.a.    | 6264              | n.a.    |
| DS5      | 34012         | 16262   | 8973                | 1641    | 1665                   | 592     | 524                | 45      | 6138              | 1687    |
| AGW1     | 35557         | n.a.    | 9184                | n.a.    | 1662                   | n.a.    | 297                | n.a.    | 5729              | n.a.    |
| LCR1     | 15171         | n.a.    | 4704                | n.a.    | 1629                   | n.a.    | 306                | n.a.    | 5275              | n.a.    |
| AGW2     | 20162         | n.a.    | 5721                | n.a.    | 1573                   | n.a.    | 180                | n.a.    | 5263              | n.a.    |
| AGW4     | 18389         | n.a.    | 5362                | n.a.    | 1597                   | n.a.    | 214                | n.a.    | 5261              | n.a.    |
| VAG1     | 18488         | n.a.    | 5385                | n.a.    | 1527                   | n.a.    | 274                | n.a.    | 4742              | n.a.    |
| VAG2     | 17942         | n.a.    | 4730                | n.a.    | 1335                   | n.a.    | 76                 | n.a.    | 4710              | n.a.    |
| VAG4     | 19473         | n.a.    | 5450                | n.a.    | 1553                   | n.a.    | 330                | n.a.    | 4637              | n.a.    |
| LCR3     | 25604         | n.a.    | 6465                | n.a.    | 1513                   | n.a.    | 285                | n.a.    | 4474              | n.a.    |
| CR2      | 12408         | 11287   | 3849                | 988     | 1546                   | 549     | 188                | 52      | 4301              | 996     |
| VAG3     | 14784         | n.a.    | 4220                | n.a.    | 1408                   | n.a.    | 96                 | n.a.    | 4147              | n.a.    |
| MM1      | 22933         | 5065    | 4945                | 1003    | 1213                   | 693     | 186                | 58      | 3844              | 1755    |
| MM3      | 19353         | 5327    | 4364                | 1203    | 1252                   | 812     | 204                | 64      | 3302              | 2617    |
| MM2      | 15528         | 3098    | 3224                | 509     | 1053                   | 502     | 151                | 37      | 2992              | 1265    |
| CR1      | 10763         | 7711    | 1273                | 898     | 661                    | 553     | 19                 | 19      | 1330              | 1028    |
| QS       | 16005         | 21950   | 5351                | 1386    | 1613                   | 420     | 462                | 12      | 5145              | 1106    |
| GoM2     | 14048         | 14622   | 4444                | 650     | 1575                   | 284     | 371                | 19      | 5035              | 687     |
| GB3      | 12074         | 22525   | 3167                | 1095    | 1131                   | 329     | 32                 | 11      | 4554              | 809     |
| NZB      | 27493         | 22973   | 6626                | 585     | 1330                   | 181     | 182                | 3,5     | 4207              | 395     |
| HRB      | 30463         | 33665   | 5810                | 1199    | 1131                   | 257     | 120                | 7,9     | 3850              | 690     |
| GB4a     | 21617         | 9254    | 4510                | 726     | 1206                   | 401     | 128                | 19      | 3838              | 904     |
| NZA      | 18425         | 24541   | 3947                | 1015    | 1135                   | 265     | 51                 | 7,8     | 3446              | 615     |
| ST       | 22912         | 15043   | 3498                | 216     | 990                    | 93      | 97                 | 1,7     | 2844              | 159     |
| GoM1     | 17754         | 14365   | 2897                | 336     | 874                    | 164     | 58                 | 9,4     | 2762              | 394     |
| HRC      | 26048         | 30925   | 4340                | 1149    | 947                    | 296     | 54                 | 18      | 2726              | 737     |
| GB2      | 20146         | 25446   | 3011                | 1087    | 830                    | 311     | 11                 | 12      | 2558              | 831     |
| JAP      | 25785         | 21080   | 3856                | 631     | 921                    | 196     | 121                | 6,1     | 2549              | 577     |
| DS3      | 9578          | 23015   | 1540                | 832     | 711                    | 252     | 7,6                | 11      | 2065              | 538     |
| HMMV     | 53605         | 15385   | 3668                | 217     | 664                    | 78      | 35                 | 1,2     | 1777              | 136     |
| NS       | 16765         | 25963   | 2099                | 485     | 690                    | 153     | 67                 | 2,1     | 1691              | 325     |
| KO       | 12446         | 10074   | 1498                | 333     | 650                    | 177     | 38                 | 3,3     | 1600              | 371     |
| GB4b     | 9018          | 12600   | 1515                | 691     | 817                    | 315     | 87                 | 10      | 1529              | 578     |
| BS2      | 17392         | 13739   | 1726                | 134     | 569                    | 57      | 30                 | 1,6     | 1497              | 128     |
| DS1      | 17217         | 18271   | 1040                | 268     | 331                    | 97      | 11                 | 1,8     | 973               | 183     |
| BS1      | 20351         | 25498   | 1234                | 302     | 376                    | 108     | 17                 | 1,5     | 842               | 178     |
| ANT      | 27721         | 20516   | 1166                | 397     | 355                    | 133     | 4,5                | 5,6     | 781               | 333     |
| DS2      | 22472         | 9738    | 865                 | 130     | 279                    | 80      | 6,8                | 1,9     | 616               | 186     |
| GB1      | 19779         | 11865   | 955                 | 440     | 360                    | 174     | 8,8                | 4,4     | 583               | 463     |
| WO       | 14375         | 16394   | 4190                | 953     | 1499                   | 421     | 296                | 20      | 4217              | 846     |
| AB1      | 19101         | 17460   | 1893                | 699     | 562                    | 245     | 17                 | 3,8     | 1760              | 452     |
| AB2      | 18755         | 22592   | 1553                | 830     | 480                    | 284     | 5,2                | 7,6     | 1407              | 739     |
| GoM3     | 12364         | 6182    | 1206                | 385     | 588                    | 269     | 28                 | 18      | 1281              | 501     |

|             |       |       |      |      |     |      |     |      |      |      |
|-------------|-------|-------|------|------|-----|------|-----|------|------|------|
| <b>ODP1</b> | 13391 | 24002 | 1937 | 550  | 842 | 176  | 99  | 9,3  | 1860 | 348  |
| <b>ODP3</b> | 16565 | 16182 | 2201 | 301  | 909 | 119  | 120 | 6,0  | 1827 | 250  |
| <b>ODP4</b> | 12336 | 7267  | 1629 | 186  | 726 | 124  | 68  | 11   | 1536 | 257  |
| <b>ODP2</b> | 17006 | 15651 | 1791 | 177  | 676 | 69   | 70  | 3,7  | 1462 | 151  |
| <b>DS4</b>  | 12996 | 12822 | 1326 | 383  | 598 | 161  | 34  | 4,8  | 1240 | 339  |
| <b>ASV3</b> | 18023 | n.a.  | 2773 | n.a. | 896 | n.a. | 146 | n.a. | 2388 | n.a. |
| <b>ASV1</b> | 8456  | n.a.  | 1424 | n.a. | 721 | n.a. | 80  | n.a. | 2088 | n.a. |
| <b>LV3</b>  | 16556 | 5135  | 1779 | 236  | 634 | 178  | 17  | 4,9  | 1886 | 368  |
| <b>ASV2</b> | 17300 | n.a.  | 1958 | n.a. | 620 | n.a. | 23  | n.a. | 1836 | n.a. |
| <b>LV2</b>  | 12080 | 9232  | 1014 | 203  | 439 | 122  | 14  | 1,9  | 1096 | 221  |
| <b>LV1</b>  | 21468 | 12267 | 1595 | 402  | 440 | 186  | 5,2 | 12   | 1065 | 547  |
| <b>LV6</b>  | 25264 | 12488 | 1529 | 512  | 460 | 203  | 18  | 12   | 1027 | 635  |
| <b>LV4</b>  | 7212  | 15068 | 763  | 241  | 477 | 95   | 19  | 1,5  | 1016 | 223  |
| <b>LV5</b>  | 18148 | 12756 | 1017 | 387  | 376 | 154  | 3,9 | 3,1  | 918  | 353  |
| <b>ASV4</b> | 17881 | n.a.  | 950  | n.a. | 331 | n.a. | 7,5 | n.a. | 793  | n.a. |
| <b>LC4</b>  | 6973  | 24435 | 625  | 193  | 414 | 59   | 25  | 1,4  | 750  | 329  |
| <b>LC1</b>  | 8165  | 27510 | 492  | 192  | 291 | 64   | 15  | 2,4  | 534  | 91   |
| <b>LC2</b>  | 3688  | 30829 | 263  | 195  | 239 | 54   | 10  | 1,4  | 395  | 171  |
| <b>LC3</b>  | 14305 | 16469 | 380  | 239  | 173 | 73   | 9,0 | 1,8  | 337  | 126  |

OTU<sub>0.03</sub>: Operational taxonomic unit at 97% 16S rRNA V6 gene sequence identity

n.a. not available

\*sorted according to decreasing Chao 1 Richness

\*\*standardized numbers based on subsampling of 3000 sequences without replacement

Table S3: Percentage of shared archaeal and bacterial taxa between ecosystems

|                                            |                   | Methane Seep | SMTZ | Coastal Sediment | Deep Sea Surface | Subsurface |
|--------------------------------------------|-------------------|--------------|------|------------------|------------------|------------|
| Shared bacterial phyla (%)                 | SMTZ              | 88           |      |                  |                  |            |
|                                            | Coastal Sediment  | 98           | 87   |                  |                  |            |
|                                            | Deep Sea Surface  | 94           | 86   | 96               |                  |            |
|                                            | Subsurface        | 81           | 83   | 82               | 82               |            |
|                                            | Hydrothermal Vent | 83           | 85   | 81               | 80               | 85         |
| Shared archaeal OTU <sub>0.03</sub> (%) *  | SMTZ              | 6            |      |                  |                  |            |
|                                            | Coastal Sediment  | 6            | 7    |                  |                  |            |
|                                            | Deep Sea Surface  | n.a.         | n.a. | n.a.             |                  |            |
|                                            | Subsurface        | 3            | 7    | 4                | n.a.             |            |
|                                            | Hydrothermal Vent | 2            | 1    | 1                | n.a.             | 1          |
| Shared bacterial OTU <sub>0.03</sub> (%) * | SMTZ              | 3            |      |                  |                  |            |
|                                            | Coastal Sediment  | 6            | 2    |                  |                  |            |
|                                            | Deep Sea Surface  | 5            | 1    | 6                |                  |            |
|                                            | Subsurface        | 2            | 4    | 1                | 0                |            |
|                                            | Hydrothermal Vent | 2            | 1    | 3                | 2                | 2          |

Pairwise comparison of community similarity between seafloor ecosystems based on presence absence OTU<sub>0.03</sub> data. \* All comparisons were significantly different from each other based on Redundancy Analysis (p<0.05) using 100 permutations for each pairwise comparison and further correction for multiple testing (6).

Table S4: Percentage of shared archaeal and bacterial OTU<sub>0.03</sub> between samples

|                   | Number of samples | Domain   | Max shared OTU <sub>0.03</sub> (%) * | Mean shared OTU <sub>0.03</sub> (%) * | Min shared OTU <sub>0.03</sub> (%) * |
|-------------------|-------------------|----------|--------------------------------------|---------------------------------------|--------------------------------------|
| Deep Sea Surface  | 14                | Bacteria | 34                                   | 19                                    | 8                                    |
|                   | 0                 | Archaea  | n.a.                                 | n.a.                                  | n.a.                                 |
| Coastal Sediments | 17                | Bacteria | 38                                   | 6                                     | <1                                   |
|                   | 6                 | Archaea  | 25                                   | 9                                     | <1                                   |
| Methane Seeps     | 23                | Bacteria | 37                                   | 5                                     | <0.1                                 |
|                   | 23                | Archaea  | 66                                   | 8                                     | 0                                    |
| SMTZ              | 4                 | Bacteria | 33                                   | 7                                     | <1                                   |
|                   | 4                 | Archaea  | 49                                   | 13                                    | 4                                    |
| Subsurface        | 5                 | Bacteria | 18                                   | 10                                    | 6                                    |
|                   | 5                 | Archaea  | 28                                   | 18                                    | 13                                   |
| Hydrothermal Vent | 14                | Bacteria | 29                                   | 3                                     | 0                                    |
|                   | 10                | Archaea  | 78                                   | 14                                    | 0                                    |

\* Pairwise comparison of community similarity within seafloor ecosystems based on presence absence OTU<sub>0.03</sub> data. Values refer to maximum, mean or minimum shared OTU<sub>0.03</sub> between any given pair of samples from the respective ecosystem. n.a. not available

Table S5: Archaeal and bacterial indicator taxa for seafloor ecosystems

|                 | Microbial taxa *<br>(class or phylum level) | Seafloor ecosystem | Indicator<br>value ** | p Value |
|-----------------|---------------------------------------------|--------------------|-----------------------|---------|
| <b>Bacteria</b> | SAR202 ( <i>Chloroflexi</i> )               | Deep Sea Surface   | 0.80                  | 0.001   |
|                 | <i>Verrucomicrobia</i> unclassified         | Deep Sea Surface   | 0.74                  | 0.001   |
|                 | JTB23 ( <i>Proteobacteria</i> )             | Deep Sea Surface   | 0.71                  | 0.001   |
|                 | <i>Gemmatimonadetes</i>                     | Deep Sea Surface   | 0.67                  | 0.001   |
|                 | KD4-96 ( <i>Chloroflexi</i> )               | Deep Sea Surface   | 0.66                  | 0.001   |
|                 | OM190 ( <i>Planctomycetes</i> )             | Deep Sea Surface   | 0.64                  | 0.001   |
|                 | RB25 ( <i>Acidobacteria</i> )               | Deep Sea Surface   | 0.63                  | 0.001   |
|                 | <i>Thermomicrobia</i>                       | Deep Sea Surface   | 0.57                  | 0.001   |
|                 | <i>Acidobacteria</i>                        | Deep Sea Surface   | 0.55                  | 0.001   |
|                 | Arctic97B-4 ( <i>Verrucomicrobia</i> )      | Deep Sea Surface   | 0.47                  | 0.002   |
|                 | <i>Acidimethylosilex</i>                    | Deep Sea Surface   | 0.46                  | 0.002   |
|                 | <i>Planctomycetacia</i>                     | Deep Sea Surface   | 0.43                  | 0.001   |
|                 | Candidate division GOUTA4                   | Deep Sea Surface   | 0.42                  | 0.004   |
|                 | ML602M-17 ( <i>Bacteroidetes</i> )          | Deep Sea Surface   | 0.42                  | 0.007   |
|                 | <i>Holophagae</i>                           | Deep Sea Surface   | 0.42                  | 0.001   |
|                 | vadinHA49 ( <i>Planctomycetes</i> )         | Deep Sea Surface   | 0.42                  | 0.003   |
|                 | Chloroplast                                 | Coastal            | 0.79                  | 0.001   |
|                 | OPB35 ( <i>Verrucomicrobia</i> )            | Coastal            | 0.56                  | 0.003   |
|                 | SM1A07 ( <i>Bacteroidetes</i> )             | Coastal            | 0.53                  | 0.002   |
|                 | Candidate division WS6                      | Coastal            | 0.52                  | 0.008   |
|                 | Candidate division Hyd24-12                 | Methane Seep       | 0.69                  | 0.005   |
|                 | Candidate division JS1                      | Methane Seep       | 0.64                  | 0.004   |
|                 | <i>Deltaproteobacteria</i>                  | Methane Seep       | 0.35                  | 0.003   |
|                 | GIF9 ( <i>Chloroflexi</i> )                 | SMTZ               | 0.86                  | 0.003   |
|                 | <i>Chlorobia</i>                            | SMTZ               | 0.61                  | 0.003   |
|                 | vadinBA26 ( <i>Chloroflexi</i> )            | Subsurface         | 0.75                  | 0.001   |
|                 | MLE1-12 ( <i>Cyanobacteria</i> )            | Subsurface         | 0.58                  | 0.002   |
|                 | Epsilonproteobacteria                       | Hydrothermal Vent  | 0.84                  | 0.002   |
| <b>Archaea</b>  | Marine Group I                              | Coastal            | 0.89                  | 0.003   |
|                 | <i>Methanobacteria</i>                      | Coastal            | 0.85                  | 0.001   |
|                 | AK31 ( <i>Thaumarchaeota</i> )              | Coastal            | 0.83                  | 0.001   |
|                 | Ancient Archaeal Group                      | Coastal            | 0.81                  | 0.001   |
|                 | pSL12 ( <i>Crenarchaeota</i> )              | Coastal            | 0.78                  | 0.001   |
|                 | South African Gold Mine Gp 1                | Coastal            | 0.64                  | 0.002   |
|                 | pMC2A209 ( <i>Crenarchaeota</i> )           | Coastal            | 0.62                  | 0.002   |
|                 | Marine Benthic Group A                      | Coastal            | 0.45                  | 0.04    |
|                 | <i>Methanomicrobia</i>                      | Methane Seep       | 0.41                  | 0.002   |
|                 | Soil Crenarchaeotic Group                   | SMTZ               | 0.62                  | 0.035   |
|                 | <i>Methanopyri</i>                          | SMTZ               | 0.63                  | 0.007   |
|                 | Misc. Crenarchaeotic Group                  | Subsurface         | 0.58                  | 0.011   |
|                 | <i>Thermococci</i>                          | Hydrothermal Vent  | 0.59                  | 0.011   |
|                 | <i>Candidatus</i> Korarchaeum               | Hydrothermal Vent  | 0.57                  | 0.024   |
|                 | <i>Archaeoglobi</i>                         | Hydrothermal Vent  | 0.54                  | 0.047   |
|                 | <i>Methanococci</i>                         | Hydrothermal Vent  | 0.50                  | 0.009   |

\*Taxonomy is based on SILVA release 102 (50)

\*\*Indicator Taxa are based on relative abundance and relative frequency of occurrence (8)

Table S6: Core bacterial orders of three seafloor ecosystems in percent relative abundance

| <b>Bacterial taxa *</b><br><b>(order level or higher)</b> | <b>Deep Sea<br/>Surface</b> | <b>Sub-<br/>surface</b> | <b>Methane<br/>Seeps</b> |
|-----------------------------------------------------------|-----------------------------|-------------------------|--------------------------|
| <i>Acidimicrobidae</i>                                    | <b>3.8 **</b>               | -                       | -                        |
| <i>Acidobacteriales</i>                                   | <b>1.8</b>                  | -                       | -                        |
| <i>Actinobacteridae</i>                                   | 2.4                         | 4.5                     | 2.2                      |
| <i>Alteromonadales</i>                                    | <b>4.0</b>                  | -                       | -                        |
| <i>Bacillales</i>                                         | 1.2                         | 4.5                     | 1.3                      |
| BD2-11 ( <i>Gemmatimonadetes</i> )                        | <b>2.0</b>                  | -                       | -                        |
| <i>Burkholderiales</i>                                    | -                           | <b>3.6 **</b>           | -                        |
| <i>Caldilineales</i>                                      | -                           | -                       | <b>1.2 **</b>            |
| Candidate division JS1                                    | -                           | 2.0                     | <b>16.9</b>              |
| <i>Caulobacterales</i>                                    | <b>1.0</b>                  | -                       | -                        |
| <i>Chromatiales</i>                                       | <b>2.5</b>                  | -                       | -                        |
| <i>Clostridiales</i>                                      | 1.4                         | 1.9                     | 1.3                      |
| <i>Desulfarculales</i>                                    | -                           | <b>2.3</b>              | -                        |
| <i>Desulfobacterales</i>                                  | 1.9                         | -                       | <b>15.1</b>              |
| <i>Desulfovibrionales</i>                                 | -                           | <b>1.5</b>              | -                        |
| <i>Desulfuromonadales</i>                                 | <b>1.9</b>                  | -                       | -                        |
| <i>Enterobacteriales</i>                                  | <b>1.3</b>                  | -                       | -                        |
| <i>Flavobacteriales</i>                                   | 2.3                         | -                       | 5.1                      |
| <i>Gammaproteobacteria</i> unclassified                   | 3.9                         | 3.8                     | -                        |
| GIF3 ( <i>Chloroflexi</i> )                               | -                           | <b>2.2</b>              | -                        |
| <i>Holophagales</i>                                       | <b>1.2</b>                  | -                       | -                        |
| <i>Lactobacillales</i>                                    | -                           | 2.2                     | 3.0                      |
| mle1-8 ( <i>Phycisphaerae</i> )                           | -                           | <b>1.5</b>              | -                        |
| <i>Myxococcales</i>                                       | <b>2.3</b>                  | -                       | -                        |
| <i>Nitrospirales</i>                                      | <b>1.4</b>                  | -                       | -                        |
| <i>Oceanospirillales</i>                                  | <b>2.3</b>                  | -                       | -                        |
| <i>Phycisphaerales</i>                                    | <b>1.0</b>                  | -                       | -                        |
| <i>Planctomycetales</i>                                   | <b>1.1</b>                  | -                       | -                        |
| <i>Proteobacteria</i> unclassified                        | 1.1                         | 2.2                     | -                        |
| <i>Pseudomonadales</i>                                    | -                           | <b>1.8</b>              | -                        |
| RB25 ( <i>Acidobacteria</i> )                             | <b>1.8</b>                  | -                       | -                        |
| <i>Rhizobiales</i>                                        | 3.2                         | 1.2                     | -                        |
| <i>Rhodobacterales</i>                                    | <b>2.0</b>                  | -                       | -                        |
| <i>Rhodospirillales</i>                                   | 2.4                         | 2.1                     | -                        |
| Sh765B-TzT-29<br>( <i>Deltaproteobacteria</i> )           | <b>2.7</b>                  | -                       | -                        |
| <i>Sphingobacteriales</i>                                 | 3.2                         | -                       | 2.5                      |
| <i>Spirochaetales</i>                                     | -                           | -                       | <b>1.1</b>               |
| vadinBA26 ( <i>Chloroflexi</i> )                          | -                           | <b>22.7</b>             | -                        |
| <i>Xanthomonadales</i>                                    | <b>2.8</b>                  | -                       | -                        |

\*Taxonomy is based on SILVA release 102 (50)

\*\* Colored numbers in bold face depict relative abundances of clades that occur exclusively or with very high relative abundances in the respective ecosystem

Table S7: Contextual data of seafloor samples

|              | Environment                     | Latitude | Longitude | Water depth (m) | Sediment depth (cmbfsf) | T °C | CH <sub>4</sub> (cat) * | SO <sub>4</sub> (cat) ** | Long-hurst Province | Long-hurst Biome | Prod. index | Climate zone | VAMPS project | Sample Code Archaea | Sample Code Bacteria |
|--------------|---------------------------------|----------|-----------|-----------------|-------------------------|------|-------------------------|--------------------------|---------------------|------------------|-------------|--------------|---------------|---------------------|----------------------|
| <b>NZS1</b>  | New Zealand Deep Sea            | -43.2880 | -175.5532 | 644             | 1.5                     | 16   | 0                       | 6                        | NEWZ                | C                | 3           | TEM          | ICM_NZS       | n.a.                | NZS_0002             |
| <b>NZS2</b>  | New Zealand Deep Sea            | -42.7820 | -176.7142 | 1025            | 1.5                     | 16   | 0                       | 6                        | NEWZ                | C                | 3           | TEM          | ICM_NZS       | n.a.                | NZS_0003             |
| <b>NZS3</b>  | New Zealand Deep Sea            | -42.9915 | 175.9303  | 1197            | 1.5                     | 15   | 0                       | 6                        | NEWZ                | C                | 3           | TEM          | ICM_NZS       | n.a.                | NZS_0004             |
| <b>NZS4</b>  | New Zealand Deep Sea            | -42.9915 | 178.9918  | 530             | 1.5                     | 16   | 0                       | 6                        | NEWZ                | C                | 3           | TEM          | ICM_NZS       | n.a.                | NZS_0005             |
| <b>NZS5</b>  | New Zealand Deep Sea            | -44.1262 | 178.6445  | 516             | 1.5                     | 14   | 0                       | 6                        | NEWZ                | C                | 3           | TEM          | ICM_NZS       | n.a.                | NZS_0006             |
| <b>NZS6</b>  | New Zealand Deep Sea            | -44.4853 | 177.1410  | 1241            | 1.5                     | 13   | 0                       | 6                        | NEWZ                | C                | 3           | TEM          | ICM_NZS       | n.a.                | NZS_0007             |
| <b>NZS7</b>  | New Zealand Deep Sea            | -43.5195 | -178.6175 | 424             | 1.5                     | 15   | 0                       | 6                        | NEWZ                | C                | 3           | TEM          | ICM_NZS       | n.a.                | NZS_0009             |
| <b>NZS8</b>  | New Zealand Deep Sea            | -44.0147 | 178.5190  | 766             | 1.5                     | 14   | 0                       | 6                        | NEWZ                | C                | 3           | TEM          | ICM_NZS       | n.a.                | NZS_0010             |
| <b>NZS9</b>  | New Zealand Deep Sea            | -42.5307 | -178.3390 | 1400            | 1.5                     | 16   | 0                       | 6                        | NEWZ                | C                | 3           | TEM          | ICM_NZS       | n.a.                | NZS_0011             |
| <b>NZS10</b> | New Zealand Deep Sea            | -38.6200 | 167.5260  | 482             | 1.5                     | 17   | 0                       | 6                        | TASM                | W                | 2           | TEM          | ICM_NZS       | n.a.                | NZS_0012             |
| <b>SMS1</b>  | East Pacific Station M          | 35.1642  | -123.0156 | 3954            | 5.0                     | 1    | 0                       | 6                        | CCAL                | C                | 3           | TEM          | ICM_SMS       | n.a.                | SMS_0007             |
| <b>SMS2</b>  | East Pacific Station M          | 35.1642  | -123.0156 | 3954            | 5.0                     | 1    | 0                       | 6                        | CCAL                | C                | 3           | TEM          | ICM_SMS       | n.a.                | SMS_0008             |
| <b>SMS3</b>  | East Pacific Station M          | 35.1642  | -123.0156 | 3954            | 5.0                     | 1    | 0                       | 6                        | CCAL                | C                | 3           | TEM          | ICM_SMS       | n.a.                | SMS_0010             |
| <b>SMS4</b>  | East Pacific Station M          | 35.1642  | -123.0156 | 3954            | 5.0                     | 1    | 0                       | 6                        | CCAL                | C                | 3           | TEM          | ICM_SMS       | n.a.                | SMS_0011             |
| <b>DS1</b>   | Gulf of Cadiz mud volcano       | 35.5617  | -9.5072   | 3860            | 87.5                    | 17   | 4                       | 1                        | CNRY                | C                | 5           | ST           | ICM_CFU       | CFU_02              | CFU_01               |
| <b>DS2</b>   | Gulf of Cadiz mud volcano       | 35.6607  | -7.3342   | 1326            | 42.5                    | 17   | 4                       | 1                        | CNRY                | C                | 5           | ST           | ICM_CFU       | CFU_04              | CFU_03               |
| <b>DS3</b>   | Gulf of Cadiz mud volcano       | 35.6616  | -7.3347   | 1326            | 67.5                    | 17   | 4                       | 1                        | CNRY                | C                | 5           | ST           | ICM_CFU       | CFU_06              | CFU_05               |
| <b>GoM1</b>  | Gulf of Mexico (in mat)         | 28.5147  | -88.2952  | 890             | 12.0                    | 5    | 4                       | 1                        | CARB                | T                | 2           | ST           | ICM_GMS       | GMS-0004            | GMS-0003             |
| <b>GoM2</b>  | Gulf of Mexico (outside mat)    | 28.5147  | -88.2952  | 890             | 12.0                    | 5    | 2                       | 6                        | CARB                | T                | 2           | ST           | ICM_GMS       | GMS-0006            | GMS-0005             |
| <b>ST</b>    | Storegga Seep enrichment        | 65.5178  | 5.4747    | 721             | 5.0                     | -1   | 4                       | 6                        | SARC                | P                | 3           | P            | ICM_GMS       | GMS-0014            | GMS-0013             |
| <b>BS2</b>   | Black Sea nodule pink           | 44.7750  | 31.9922   | 225             | 0.1                     | 8    | 4                       | 5                        | MEDI                | W                | 2           | TEM          | BPC_MET       | MET004              | MET003               |
| <b>GB4a</b>  | Guaymas 4484 1cm                | 27.0065  | -111.4096 | 2000            | 1.0                     | 2    | 4                       | 6                        | CAMR                | C                | 3           | ST           | ICM_GMS       | GMS-0017            | GMS-0018             |
| <b>GB4b</b>  | Guaymas 4484 4cm                | 27.0065  | -111.4096 | 2000            | 5.0                     | 50   | 4                       | 3                        | CAMR                | C                | 3           | ST           | ICM_GMS       | GMS-0019            | GMS-0020             |
| <b>ANT</b>   | Extinct Antarctic Seep          | -65.4350 | -61.4415  | 850             | 17.0                    | 2    | 1                       | 6                        | APLR                | P                | 3           | P            | BPC_MET       | MET002              | MET001               |
| <b>BS1</b>   | Black Sea nodule black          | 44.7750  | 31.9922   | 225             | 0.1                     | 8    | 4                       | 5                        | MEDI                | W                | 2           | TEM          | ICM_GMS       | GMS-0016            | GMS-0015             |
| <b>NS</b>    | Gulfaks - North Sea             | 61.1733  | -2.2417   | 145             | 1.5                     | 8    | 5                       | 6                        | NECS                | C                | 5           | P            | BPC_MET       | MET006              | MET005               |
| <b>HMMV</b>  | Håkon Mosby Mud Volcano         | 72.0032  | 14.7205   | 1263            | 1.5                     | -1   | 4                       | 1                        | SARC                | P                | 3           | P            | BPC_MET       | MET008              | MET007               |
| <b>KO</b>    | REGAB Pockmark - Kongo          | -5.8106  | 9.7131    | 3172            | 3.0                     | 3    | 1                       | 5                        | ETRA                | T                | 2           | T            | BPC_MET       | MET010              | MET009               |
| <b>JAP</b>   | Japan Trench                    | 39.1059  | 143.8927  | 5347            | 5.0                     | 1    | 2                       | 3                        | KURO                | W                | 2           | ST           | BPC_MET       | MET012              | MET011               |
| <b>HRB</b>   | Hydrate Ridge - Beggiaoa mat    | 44.5684  | -125.1468 | 777             | 4.0                     | 4    | 5                       | 4                        | CCAL                | C                | 3           | TEM          | BPC_MET       | MET014              | MET013               |
| <b>HRC</b>   | Hydrate Ridge - Calyptogena     | 44.5698  | -125.1475 | 787             | 4.0                     | 4    | 5                       | 5                        | CCAL                | C                | 3           | TEM          | BPC_MET       | MET016              | MET015               |
| <b>QS</b>    | Quepos Slide - Costa Rica       | 8.8500   | -84.2148  | 400             | 5.0                     | 9    | 2                       | 3                        | CAMR                | C                | 3           | T            | BPC_MET       | MET018              | MET017               |
| <b>NZA</b>   | Hikurangi (NZ) - Ampharetid bed | -41.7821 | 175.4020  | 1056            | 5.0                     | 4    | 3                       | 5                        | NEWZ                | C                | 3           | TEM          | BPC_MET       | MET020              | MET019               |
| <b>NZB</b>   | Hiikurangi (NZ) - Beggiaoa mat  | -41.8458 | 175.6347  | 1058            | 5.0                     | 4    | 3                       | 4                        | NEWZ                | C                | 3           | TEM          | BPC_MET       | MET022              | MET021               |
| <b>GB3</b>   | Guaymas Basin - 4489            | 27.0074  | -111.4089 | 2000            | 6.0                     | 85   | 4                       | 6                        | CAMR                | C                | 3           | ST           | BPC_MET       | MET024              | MET023               |
| <b>GB2</b>   | Guaymas Basin - 4486            | 27.0077  | -111.4088 | 2000            | 7.0                     | 25   | 4                       | 6                        | CAMR                | C                | 3           | ST           | BPC_MET       | MET026              | MET025               |
| <b>GB1</b>   | Guaymas Basin - 4483            | 27.0065  | -111.4087 | 2000            | 9.0                     | 15   | 4                       | 4                        | CAMR                | C                | 3           | ST           | BPC_MET       | MET028              | MET027               |
| <b>WO</b>    | White Oak River Estuary         | 34.7415  | -77.1241  | 2               | 24.0                    | 11   | 3                       | 2                        | NWCS                | C                | 4           | ST           | ICM_GMS       | GMS-0002            | GMS-0001             |
| <b>AB1</b>   | Aarhus Bay - GC174_16           | 56.1179  | 10.3482   | 15              | 149.5                   | 8    | 2                       | 3                        | NECS                | C                | 5           | TEM          | BPC_MET       | MET030              | MET029               |
| <b>AB2</b>   | Aarhus Bay - GC174_17           | 56.1179  | 10.3482   | 15              | 169.5                   | 8    | 3                       | 2                        | NECS                | C                | 5           | TEM          | BPC_MET       | MET032              | MET031               |
| <b>GoM3</b>  | Gulf of Mexico (deep/MC118)     | 28.5126  | -88.2940  | 890             | 212.0                   | 6    | 4                       | 1                        | CARB                | T                | 2           | ST           | ICM_GMS       | GMS-0008            | GMS-0007             |

|             |                             |          |           |      |        |    |   |   |      |   |   |     |         |        |          |
|-------------|-----------------------------|----------|-----------|------|--------|----|---|---|------|---|---|-----|---------|--------|----------|
| <b>DS5</b>  | Coastal Sand - North Sea    | 51.8781  | 0.9335    | 1    | 2.5    | 13 | 4 | 4 | NECS | C | 5 | TEM | ICM_CFU | CFU_12 | CFU_11   |
| <b>MM1</b>  | Coastal Sand - North Sea    | 53.4922  | 6.1400    | 0    | 0.3    | 8  | 0 | 6 | NECS | C | 5 | TEM | ICM_CMM | CMM_11 | CMM_02   |
| <b>MM2</b>  | Coastal Sand - North Sea    | 53.4922  | 6.1400    | 0    | 0.3    | 18 | 0 | 6 | NECS | C | 5 | TEM | ICM_CMM | CMM_14 | CMM_05   |
| <b>MM3</b>  | Coastal Sand - North Sea    | 53.4922  | 6.1400    | 0    | 0.3    | 17 | 0 | 6 | NECS | C | 5 | TEM | ICM_CMM | CMM_17 | CMM_08   |
| <b>CR1</b>  | Coral Reef Surface - Oahu   | 21.4667  | -157.8000 | 1    | 1.0    | 25 | 0 | 6 | NPTG | T | 1 | ST  | ICM_CRS | CRS_06 | CRS_01   |
| <b>CR2</b>  | Coral Reef Deep - Oahu      | 21.4667  | -157.8000 | 1    | 50.0   | 25 | 0 | 6 | NPTG | T | 1 | ST  | ICM_CRS | CRS_07 | CRS_04   |
| <b>AGW1</b> | French Guiana Shallow Coast | 5.5448   | -53.1790  | 1    | 1.5    | 28 | 0 | 6 | GUIA | C | 5 | T   | ICM_AGW | n.a.   | AGW_0001 |
| <b>AGW2</b> | French Guiana Shallow Coast | 5.5448   | -53.1790  | 1    | 8.5    | 28 | 0 | 6 | GUIA | C | 5 | T   | ICM_AGW | n.a.   | AGW_0002 |
| <b>AGW3</b> | French Guiana Deep Coast    | 5.5428   | -52.1974  | 52   | 1.5    | 28 | 0 | 6 | GUIA | C | 5 | T   | ICM_AGW | n.a.   | AGW_0003 |
| <b>AGW4</b> | French Guiana Deep Coast    | 5.5428   | -52.1974  | 52   | 8.5    | 28 | 0 | 6 | GUIA | C | 5 | T   | ICM_AGW | n.a.   | AGW_0004 |
| <b>LCR1</b> | Caribbean Shallow Reef      | 17.9389  | -67.0478  | 2    | 5.0    | 28 | 0 | 6 | CARB | T | 2 | T   | ICM_LCR | n.a.   | LCR_0001 |
| <b>LCR2</b> | Caribbean Deep Reef         | 17.8761  | -67.0400  | 50   | 5.0    | 25 | 0 | 6 | CARB | T | 2 | T   | ICM_LCR | n.a.   | LCR_0003 |
| <b>LCR3</b> | South Argentina Intertidal  | -42.4256 | -64.1175  | 0    | 0.0    | 10 | 0 | 6 | FKLD | C | 4 | TEM | ICM_LCR | n.a.   | LCR_0015 |
| <b>VAG1</b> | Chilean Coastal Sediment    | -36.6900 | -73.0700  | 15   | 2.5    | 13 | 0 | 6 | CHIL | C | 2 | TEM | ICM_VAG | n.a.   | VAG_0009 |
| <b>VAG2</b> | Chilean Coastal Sediment    | -36.6400 | -73.0400  | 27   | 2.5    | 11 | 0 | 6 | CHIL | C | 2 | TEM | ICM_VAG | n.a.   | VAG_0010 |
| <b>VAG3</b> | Chilean Coastal Sediment    | -36.6000 | -73.0000  | 35   | 2.5    | 12 | 0 | 6 | CHIL | C | 2 | TEM | ICM_VAG | n.a.   | VAG_0011 |
| <b>VAG4</b> | Chilean Coastal Sediment    | -36.5100 | -73.1200  | 88   | 2.5    | 10 | 0 | 6 | CHIL | C | 2 | TEM | ICM_VAG | n.a.   | VAG_0012 |
| <b>ODP1</b> | ODP Core - Peru Margin      | -10.9833 | -77.9500  | 150  | 250.0  | 14 | 1 | 5 | CHIL | C | 2 | T   | KCK_ODP | ODP_09 | ODP_10   |
| <b>ODP2</b> | ODP Core - Peru Margin      | -10.9833 | -77.9500  | 150  | 3015.0 | 15 | 3 | 1 | CHIL | C | 2 | T   | KCK_ODP | ODP_11 | ODP_12   |
| <b>ODP3</b> | ODP Core - Peru Margin      | -10.9833 | -77.9500  | 150  | 5035.0 | 15 | 4 | 1 | CHIL | C | 2 | T   | KCK_ODP | ODP_13 | ODP_14   |
| <b>ODP4</b> | ODP Core - Peru Margin      | -10.9833 | -77.9500  | 150  | 9145.0 | 17 | 3 | 1 | CHIL | C | 2 | T   | KCK_ODP | ODP_15 | ODP_16   |
| <b>DS4</b>  | ODP Core - Peru Margin      | -11.0645 | -78.0778  | 262  | 3505.0 | 15 | 2 | 3 | CHIL | C | 2 | T   | ICM_CFU | CFU_08 | CFU_07   |
| <b>LV1</b>  | Lau Hydrothermal Vent       | -20.3167 | -176.1363 | 2707 | 0.0    | 3  | 1 | 6 | SPSG | T | 1 | T   | ICM_ALR | ALR_09 | ALR_01   |
| <b>LV2</b>  | Lau Hydrothermal Vent       | -20.3179 | -176.1374 | 2714 | 0.0    | 3  | 1 | 6 | SPSG | T | 1 | T   | ICM_ALR | ALR_10 | ALR_02   |
| <b>LV3</b>  | Lau Hydrothermal Vent       | -22.1807 | -176.6012 | 1908 | 0.0    | 3  | 1 | 6 | SPSG | T | 1 | T   | ICM_ALR | ALR_12 | ALR_04   |
| <b>LV4</b>  | Lau Hydrothermal Vent       | -20.0530 | -176.1337 | 2619 | 0.0    | 3  | 1 | 6 | SPSG | T | 1 | T   | ICM_ALR | ALR_16 | ALR_08   |
| <b>LV5</b>  | Lau Hydrothermal Vent       | -20.3167 | -176.1363 | 2707 | 0.0    | 3  | 1 | 6 | SPSG | T | 1 | T   | ICM_ALR | ALR_18 | ALR_17   |
| <b>LV6</b>  | Lau Hydrothermal Vent       | -20.3167 | -176.1363 | 2707 | 0.0    | 3  | 1 | 6 | SPSG | T | 1 | T   | ICM_ALR | ALR_20 | ALR_19   |
| <b>LC1</b>  | Lost City Hydrothermal Vent | 30.1240  | -42.1193  | 827  | 0.0    | 7  | 1 | 6 | NASW | W | 1 | ST  | ICM_LCY | LCY_12 | LCY_01   |
| <b>LC2</b>  | Lost City Hydrothermal Vent | 30.1240  | -42.1193  | 782  | 0.0    | 73 | 1 | 6 | NASW | W | 1 | ST  | ICM_LCY | LCY_14 | LCY_03   |
| <b>LC3</b>  | Lost City Hydrothermal Vent | 30.1240  | -42.1193  | 735  | 0.0    | 81 | 1 | 6 | NASW | W | 1 | ST  | ICM_LCY | LCY_16 | LCY_05   |
| <b>LC4</b>  | Lost City Hydrothermal Vent | 30.1240  | -42.1193  | 782  | 0.0    | 73 | 1 | 6 | NASW | W | 1 | ST  | ICM_LCY | LCY_18 | LCY_07   |
| <b>ASV1</b> | Azores Shallow Vent         | 37.7240  | -25.3194  | 7    | 0.0    | 60 | 1 | 6 | NASE | W | 1 | ST  | ICM_ASV | n.a.   | ASV_0007 |
| <b>ASV2</b> | Azores Shallow Vent         | 37.7240  | -25.3194  | 6    | 0.0    | 60 | 1 | 6 | NASE | W | 1 | ST  | ICM_ASV | n.a.   | ASV_0008 |
| <b>ASV3</b> | Azores Shallow Vent         | 38.2333  | -26.6333  | 20   | 0.0    | 40 | 1 | 6 | NASE | W | 1 | ST  | ICM_ASV | n.a.   | ASV_0015 |
| <b>ASV4</b> | Azores Shallow Vent         | 38.2333  | -26.6333  | 20   | 0.0    | 40 | 1 | 6 | NASE | W | 1 | ST  | ICM_ASV | n.a.   | ASV_0016 |

\*Methane concentrations are presented in categories: 0: 0-0.001 mM; 1: 0.001-0.01 mM; 2: 0.01-0.1 mM; 3: 0.1-1 mM; 4: 1-10 mM; 5: 10-100 mM \*\*Sulfate concentrations are presented in categories: 1: 0-1 mM; 2: 1-2 mM; 3: 2-5 mM; 4: 5-10 mM; 5: 10-20 mM; 6: 20-30 mM

The ICoMM contextual geospatial and physicochemical parameters are available on the web (VAMPS website: <http://vamps.mbl.edu>. // MICROBIS website: <http://icomm.mbl.edu.microbis>). Additional data are from references (4, 5, 24, 25, 51-61)



Table S8: Qualitative comparison of culture-independent methods

| Methane Seep                                            | Organism | 16S rRNA<br>V6 region * | 16S rRNA<br>Full length ** | CARD-FISH *** |
|---------------------------------------------------------|----------|-------------------------|----------------------------|---------------|
| <b>Håkon Mosby mud volcano<br/><i>Beggiatoa</i> mat</b> | ANME-1   | -                       | -                          | -             |
|                                                         | ANME-2   | +                       | -                          | -             |
|                                                         | ANME-3   | +++                     | +++                        | +++           |
| <b>Hydrate Ridge<br/><i>Beggiatoa</i> mat</b>           | ANME-1   | ++                      | ++                         | ++            |
|                                                         | ANME-2   | +++                     | +++                        | +++           |
|                                                         | ANME-3   | +                       | +                          | n.d.          |
| <b>Hikurangi - New Zealand<br/><i>Beggiatoa</i> mat</b> | ANME-1   | -                       | -                          | -             |
|                                                         | ANME-2   | +++                     | +++                        | +++           |
|                                                         | ANME-3   | ++                      | ++                         | +             |
| <b>Gullfaks - North Sea<br/><i>Beggiatoa</i> mat</b>    | ANME-1   | +                       | -                          | -             |
|                                                         | ANME-2   | +++                     | +++                        | +++           |
|                                                         | ANME-3   | +                       | -                          | -             |

\* Sequenced using 454 pyrosequencing  
in situ hybridization - not detected

\*\* Sequenced using Sanger method  
+ present ++ abundant

\*\*\* Catalyzed reporter deposition fluorescence  
+++ dominant n.d. not determined

Table S9: Sequence read numbers of the ten most frequent OTU<sub>0.03</sub> of key functional clades

| DS1   | DS2 | DS3 | GoM1 | GoM2 | ST    | BS2   | GB4a | GB4b | ANT | BS1   | NS    | HMMV  | KO   | JAP  | HRB  | HRC  | QS   | NZ1  | NZ2   | GB3 | GB2 | GB1 | Total Reads | Clade                                          |
|-------|-----|-----|------|------|-------|-------|------|------|-----|-------|-------|-------|------|------|------|------|------|------|-------|-----|-----|-----|-------------|------------------------------------------------|
| 9     | 0   | 92  | 1930 | 2506 | 11246 | 26    | 0    | 0    | 122 | 20428 | 17370 | 75    | 545  | 415  | 8938 | 4203 | 4343 | 4371 | 11647 | 0   | 245 | 0   | 88511       | <b>ANME2ab (OTU<sub>1352</sub>)</b>            |
| 46    | 0   | 8   | 577  | 447  | 4     | 0     | 0    | 0    | 883 | 0     | 7     | 13956 | 5455 | 29   | 6736 | 1885 | 13   | 6174 | 3395  | 0   | 27  | 0   | 39642       | ANME3                                          |
| 13189 | 44  | 883 | 2577 | 14   | 0     | 30    | 45   | 81   | 9   | 17    | 0     | 0     | 0    | 2    | 438  | 1511 | 0    | 0    | 0     | 0   | 0   | 0   | 18840       | ANME1                                          |
| 32    | 0   | 0   | 865  | 69   | 88    | 0     | 1    | 0    | 0   | 319   | 37    | 1     | 880  | 7022 | 3067 | 1359 | 114  | 133  | 18    | 0   | 56  | 0   | 14061       | ANME2c                                         |
| 0     | 0   | 538 | 890  | 111  | 0     | 10548 | 8    | 5    | 0   | 17    | 0     | 0     | 0    | 66   | 649  | 0    | 0    | 0    | 0     | 0   | 0   | 0   | 12832       | ANME1b                                         |
| 1     | 0   | 28  | 361  | 335  | 1570  | 4     | 0    | 0    | 27  | 2580  | 1941  | 25    | 32   | 32   | 1040 | 536  | 627  | 637  | 1590  | 0   | 45  | 0   | 11411       | ANME2ab                                        |
| 106   | 0   | 492 | 3012 | 236  | 4     | 27    | 0    | 0    | 246 | 1     | 0     | 0     | 16   | 0    | 503  | 3811 | 0    | 1    | 0     | 0   | 0   | 0   | 8455        | ANME1b                                         |
| 5     | 0   | 3   | 0    | 0    | 0     | 1     | 1552 | 3336 | 0   | 0     | 0     | 0     | 0    | 0    | 40   | 21   | 0    | 0    | 0     | 1   | 0   | 2   | 4961        | ANME1                                          |
| 0     | 0   | 135 | 181  | 14   | 0     | 2329  | 1    | 0    | 0   | 0     | 0     | 0     | 0    | 0    | 13   | 194  | 0    | 0    | 0     | 0   | 0   | 0   | 2867        | ANME1b                                         |
| 2383  | 3   | 33  | 193  | 0    | 0     | 4     | 5    | 53   | 2   | 0     | 0     | 0     | 0    | 0    | 40   | 140  | 0    | 0    | 0     | 0   | 0   | 0   | 2856        | ANME1a                                         |
| 0     | 0   | 0   | 0    | 9    | 67    | 0     | 16   | 14   | 0   | 0     | 303   | 5488  | 114  | 73   | 130  | 61   | 2    | 2356 | 954   | 3   | 8   | 3   | 9601        | <b>Methylococcales (OTU<sub>22064</sub>)</b>   |
| 0     | 0   | 0   | 0    | 0    | 0     | 0     | 0    | 0    | 0   | 0     | 0     | 3933  | 0    | 0    | 0    | 0    | 0    | 1    | 0     | 0   | 0   | 0   | 3934        | <i>Methylococcales</i>                         |
| 0     | 0   | 0   | 1    | 26   | 98    | 0     | 6    | 15   | 0   | 0     | 826   | 11    | 51   | 149  | 122  | 54   | 5    | 110  | 329   | 1   | 2   | 0   | 1806        | <i>Methylococcales</i>                         |
| 0     | 0   | 2   | 1    | 12   | 37    | 0     | 12   | 0    | 0   | 0     | 40    | 802   | 11   | 7    | 26   | 11   | 0    | 215  | 128   | 1   | 7   | 0   | 1312        | <i>Methylococcales</i>                         |
| 0     | 0   | 0   | 0    | 0    | 50    | 0     | 12   | 0    | 0   | 0     | 0     | 816   | 35   | 34   | 16   | 8    | 0    | 157  | 91    | 1   | 0   | 44  | 1264        | <i>Methylococcales</i>                         |
| 0     | 0   | 0   | 0    | 0    | 0     | 0     | 0    | 0    | 0   | 0     | 0     | 454   | 0    | 0    | 0    | 0    | 0    | 0    | 0     | 0   | 0   | 0   | 454         | <i>Methylococcales</i>                         |
| 0     | 0   | 0   | 0    | 1    | 3     | 0     | 3    | 0    | 0   | 0     | 1     | 47    | 5    | 2    | 11   | 2    | 1    | 276  | 35    | 0   | 1   | 0   | 388         | <i>Methylococcales</i>                         |
| 0     | 0   | 0   | 0    | 15   | 77    | 0     | 11   | 10   | 0   | 0     | 61    | 3     | 2    | 24   | 21   | 10   | 0    | 10   | 50    | 2   | 1   | 0   | 297         | <i>Methylococcales</i>                         |
| 0     | 0   | 0   | 3    | 2    | 77    | 0     | 6    | 0    | 0   | 0     | 1     | 8     | 0    | 16   | 11   | 3    | 16   | 4    | 11    | 0   | 0   | 0   | 158         | <i>Methylococcales</i>                         |
| 0     | 0   | 0   | 0    | 0    | 0     | 0     | 0    | 0    | 0   | 0     | 0     | 0     | 1    | 92   | 0    | 0    | 0    | 0    | 0     | 0   | 0   | 0   | 93          | <i>Methylococcales</i>                         |
| 0     | 0   | 0   | 1126 | 127  | 423   | 21    | 0    | 0    | 0   | 405   | 223   | 2     | 24   | 615  | 497  | 208  | 99   | 54   | 835   | 1   | 1   | 0   | 4661        | <b>Desulfobacterales (OTU<sub>44540</sub>)</b> |
| 9     | 0   | 7   | 147  | 85   | 145   | 22    | 2    | 0    | 6   | 3133  | 192   | 0     | 3    | 79   | 191  | 124  | 117  | 12   | 94    | 76  | 85  | 121 | 4650        | <i>Desulfobacterales</i>                       |
| 0     | 0   | 0   | 0    | 0    | 162   | 1     | 0    | 0    | 0   | 2738  | 1     | 567   | 0    | 3    | 44   | 4    | 4    | 0    | 62    | 0   | 0   | 0   | 3586        | <i>Desulfobacterales</i>                       |
| 0     | 0   | 0   | 2    | 24   | 238   | 0     | 61   | 0    | 0   | 0     | 754   | 2     | 66   | 496  | 691  | 145  | 9    | 7    | 169   | 54  | 86  | 0   | 2804        | <i>Desulfobacterales</i>                       |
| 0     | 0   | 35  | 150  | 16   | 328   | 218   | 802  | 335  | 0   | 3     | 0     | 0     | 0    | 0    | 106  | 704  | 3    | 0    | 0     | 5   | 3   | 20  | 2728        | <i>Desulfobacterales</i>                       |
| 0     | 0   | 1   | 0    | 12   | 8     | 0     | 0    | 0    | 15  | 0     | 43    | 310   | 341  | 306  | 96   | 16   | 27   | 242  | 931   | 4   | 6   | 65  | 2423        | <i>Desulfobacterales</i>                       |
| 0     | 0   | 0   | 0    | 0    | 0     | 0     | 0    | 0    | 0   | 0     | 0     | 2163  | 0    | 73   | 0    | 0    | 0    | 0    | 0     | 0   | 0   | 0   | 2236        | <i>Desulfobacterales</i>                       |
| 0     | 0   | 0   | 0    | 1    | 0     | 0     | 1    | 0    | 0   | 0     | 28    | 980   | 14   | 10   | 468  | 45   | 21   | 268  | 50    | 0   | 3   | 26  | 1915        | <i>Desulfobacterales</i>                       |
| 0     | 0   | 0   | 0    | 0    | 5     | 0     | 0    | 0    | 0   | 0     | 0     | 0     | 1459 | 71   | 0    | 0    | 0    | 0    | 1     | 1   | 0   | 0   | 1537        | <i>Desulfobacterales</i>                       |
| 1     | 0   | 0   | 707  | 79   | 309   | 11    | 0    | 0    | 0   | 35    | 23    | 0     | 0    | 58   | 93   | 40   | 2    | 7    | 121   | 0   | 0   | 0   | 1486        | <i>Desulfobacterales</i>                       |
| 0     | 0   | 2   | 5    | 71   | 598   | 0     | 4    | 0    | 0   | 0     | 221   | 47    | 129  | 500  | 474  | 275  | 39   | 78   | 139   | 85  | 106 | 0   | 2773        | <b>Thiotrichales (OTU<sub>21117</sub>)</b>     |
| 0     | 0   | 0   | 0    | 0    | 0     | 0     | 298  | 223  | 0   | 0     | 0     | 0     | 0    | 0    | 0    | 0    | 0    | 0    | 0     | 1   | 1   | 13  | 536         | <i>Thiotrichales</i>                           |
| 0     | 0   | 0   | 1    | 17   | 34    | 0     | 0    | 0    | 0   | 1     | 5     | 12    | 10   | 127  | 4    | 7    | 0    | 27   | 51    | 3   | 1   | 0   | 300         | <i>Thiotrichales</i>                           |
| 0     | 0   | 0   | 0    | 17   | 123   | 0     | 1    | 0    | 0   | 0     | 12    | 3     | 3    | 11   | 40   | 18   | 2    | 0    | 15    | 6   | 6   | 0   | 257         | <i>Thiotrichales</i>                           |
| 0     | 0   | 0   | 0    | 0    | 1     | 0     | 9    | 0    | 0   | 0     | 1     | 22    | 18   | 0    | 4    | 0    | 0    | 80   | 14    | 0   | 0   | 0   | 149         | <i>Thiotrichales</i>                           |
| 0     | 0   | 0   | 0    | 2    | 32    | 0     | 0    | 2    | 0   | 0     | 2     | 2     | 0    | 16   | 26   | 4    | 1    | 1    | 15    | 4   | 7   | 0   | 114         | <i>Thiotrichales</i>                           |
| 0     | 0   | 0   | 0    | 0    | 0     | 0     | 2    | 0    | 0   | 0     | 0     | 0     | 5    | 0    | 1    | 0    | 0    | 82   | 15    | 0   | 2   | 0   | 107         | <i>Thiotrichales</i>                           |
| 0     | 0   | 0   | 0    | 0    | 0     | 0     | 0    | 0    | 0   | 0     | 0     | 1     | 2    | 31   | 2    | 1    | 0    | 58   | 6     | 0   | 1   | 0   | 102         | <i>Thiotrichales</i>                           |
| 0     | 0   | 0   | 0    | 21   | 0     | 0     | 0    | 0    | 0   | 0     | 0     | 0     | 1    | 0    | 31   | 4    | 1    | 0    | 0     | 11  | 28  | 0   | 97          | <i>Thiotrichales</i>                           |
| 0     | 0   | 0   | 0    | 0    | 5     | 0     | 3    | 0    | 0   | 0     | 0     | 0     | 1    | 6    | 2    | 3    | 27   | 1    | 7     | 3   | 7   | 20  | 85          | <i>Thiotrichales</i>                           |

The numbers correspond to observed sequence reads per sample of the ten most frequent OTU<sub>0.03</sub> of the respective order.

The light green boxes depict relative single sequence OTU<sub>0.03</sub> (SSO<sub>rel</sub>). SSO<sub>rel</sub> occur at least at one seep only once, but are more frequent at other seeps (1)

## References

1. Gobet A, *et al.* (2012) Diversity and dynamics of rare and of resident bacterial populations in coastal sands. *ISME J* 6(3):542-553.
2. Gaidos E, Rusch A, & Ilardo M (2010) Ribosomal tag pyrosequencing of DNA and RNA from benthic coral reef microbiota: community spatial structure, rare members and nitrogen-cycling guilds. *Environ Microbiol* 13(5):1138-1152.
3. Hamilton TL, Peters JW, Skidmore ML, & Boyd ES (2013) Molecular evidence for an active endogenous microbiome beneath glacial ice. *ISME J* 7(7):1402-1412.
4. Biddle JF, *et al.* (2012) Anaerobic oxidation of methane at different temperature regimes in Guaymas Basin hydrothermal sediments. *ISME J* 6(5):1018-1031.
5. Treude T, *et al.* (2007) Consumption of Methane and CO<sub>2</sub> by Methanotrophic Microbial Mats from Gas Seeps of the Anoxic Black Sea. *Appl Environ Microbiol* 73(7):2271-2283.
6. Benjamini Y & Hochberg Y (1995) Controlling the False Discovery Rate: A Practical and Powerful Approach to Multiple Testing. *J Roy Stat Soc B Met* 57(1):289-300.
7. Harrison BK, Zhang H, Berelson W, & Orphan VJ (2009) Variations in Archaeal and Bacterial Diversity Associated with the Sulfate-Methane Transition Zone in Continental Margin Sediments (Santa Barbara Basin, California). *Appl Environ Microbiol* 75(6):1487-1499.
8. Dufrene M & Legendre P (1997) Species Assemblages And Indicator Species: The Need For A Flexible Asymmetrical Approach. *Ecol Monogr* 67(3):345-366.
9. Campbell BJ, Summers Engel A, Porter ML, & Takai K (2006) The versatile  $\epsilon$ -proteobacteria: key players in sulphidic habitats. *Nat Rev Microbiol* 4(6):458-468.
10. Durbin AM & Teske A (2011) Microbial diversity and stratification of South Pacific abyssal marine sediments. *Environ Microbiol* 13(12):3219-3234.
11. Lloyd KG, *et al.* (2013) Predominant archaea in marine sediments degrade detrital proteins. *Nature* 496(7444):215-218.
12. Meng J, *et al.* (2014) Genetic and functional properties of uncultivated MCG archaea assessed by metagenome and gene expression analyses. *ISME J* 8(3):650-659.
13. Nunoura T, *et al.* (2013) Isolation and Characterization of a Thermophilic, Obligately Anaerobic and Heterotrophic Marine *Chloroflexi* Bacterium from a *Chloroflexi*-dominated Microbial Community Associated with a Japanese Shallow Hydrothermal System, and Proposal for *Thermomarinilinea lacunofontalis* gen. nov., sp. nov. *Microbes Environ* 28(2):228-235.
14. Paul K, Nonoh JO, Mikulski L, & Brune A (2012) "Methanoplasmatales," Thermoplasmatales-Related Archaea in Termite Guts and Other Environments, Are the Seventh Order of Methanogens. *Appl Environ Microbiol* 78(23):8245-8253.
15. Hubert C, *et al.* (2009) A Constant Flux of Diverse Thermophilic Bacteria into the Cold Arctic Seabed. *Science* 325(5947):1541-1544.

16. Dubinina G, Grabovich M, Leshcheva N, Rainey FA, & Gavrish E (2011) Spirochaeta perfilievii sp. nov., an oxygen-tolerant, sulfide-oxidizing, sulfur- and thiosulfate-reducing spirochaete isolated from a saline spring. *Int J Syst Evol Microbiol* 61(1):110-117.
17. Parkes RJ, *et al.* (2014) A review of prokaryotic populations and processes in sub-seafloor sediments, including biosphere:geosphere interactions. *Mar Geol* 352(0):409-425.
18. Gies EA, Konwar KM, Beatty JT, & Hallam SJ (2014) Illuminating Microbial Dark Matter in Meromictic Sakinaw Lake. *Appl Environ Microbiol* 80(21):6807-6818.
19. Chevalier N, Bouloubassi I, Birgel D, Taphanel MH, & López-García P (2013) Microbial methane turnover at Marmara Sea cold seeps: a combined 16S rRNA and lipid biomarker investigation. *Geobiology* 11(1):55-71.
20. Jørgensen SL, *et al.* (2012) Correlating microbial community profiles with geochemical data in highly stratified sediments from the Arctic Mid-Ocean Ridge. *Proc Natl Acad Sci USA* 109(42):2846-2855.
21. Liu L, Yang J, Yu X, Chen G, & Yu Z (2013) Patterns in the Composition of Microbial Communities from a Subtropical River: Effects of Environmental, Spatial and Temporal Factors. *PLoS ONE* 8(11):e81232.
22. Ramette A & Tiedje JM (2007) Multiscale responses of microbial life to spatial distance and environmental heterogeneity in a patchy ecosystem. *Proc Natl Acad Sci USA* 104(8):2761-2766.
23. Konopka A (2009) What is microbial community ecology? *ISME J* 3(11):1223-1230.
24. Felden J, *et al.* (2014) Anaerobic methanotrophic community of a 5346-m-deep vesicomid clam colony in the Japan Trench. *Geobiology* 12(3):183-199.
25. Ruff SE, *et al.* (2013) Microbial Communities of Deep-Sea Methane Seeps at Hikurangi Continental Margin (New Zealand). *PLoS ONE* 8(9):e72627.
26. Felden J, *et al.* (2013) Limitations of microbial hydrocarbon degradation at the Amon mud volcano (Nile deep-sea fan). *Biogeosciences* 10(5):3269-3283.
27. Huber JA, *et al.* (2007) Microbial Population Structures in the Deep Marine Biosphere. *Science* 318(5847):97-100.
28. Sogin ML, *et al.* (2006) Microbial diversity in the deep sea and the underexplored "rare biosphere". *Proc Natl Acad Sci USA* 103(32):12115-12120.
29. Schloss PD, Gevers D, & Westcott SL (2011) Reducing the Effects of PCR Amplification and Sequencing Artifacts on 16S rRNA-Based Studies. *PLoS ONE* 6(12):e27310.
30. Quince C, *et al.* (2009) Accurate determination of microbial diversity from 454 pyrosequencing data. *Nat Meth* 6(9):639-641.
31. Huse SM, Welch DM, Morrison HG, & Sogin ML (2010) Ironing out the wrinkles in the rare biosphere through improved OTU clustering. *Environ Microbiol* 12(7):1889-1898.

32. Edgar RC, Haas BJ, Clemente JC, Quince C, & Knight R (2011) UCHIME improves sensitivity and speed of chimera detection. *Bioinformatics* 27(16):2194-2200.
33. Hill TCJ, Walsh KA, Harris JA, & Moffett BF (2003) Using ecological diversity measures with bacterial communities. *FEMS Microbiol Ecol* 43(1):1-11.
34. Chao A (1984) Nonparametric Estimation of the Number of Classes in a Population. *Scand J Stat* 11(4):265-270.
35. Bray JR & Curtis JT (1957) An Ordination of the Upland Forest Communities of Southern Wisconsin. *Ecol Monogr* 27(4):326-349.
36. Kruskal JB (1964) Nonmetric multidimensional scaling: A numerical method. *Psychometrika* 29(2):115-129.
37. Gower JC (1975) Generalized Procrustes analysis. *Psychometrika* 40:33-51.
38. Legendre P & Legendre L (1998) *Numerical Ecology* (Elsevier Science B.V., Amsterdam) 2nd Ed p 853.
39. Nekola JC & White PS (1999) The distance decay of similarity in biogeography and ecology. *J Biogeogr* 26(4):867-878.
40. Rosenzweig M, L. (1995) *Species Diversity in Space and Time* (Cambridge University Press).
41. Zinger L, Boetius A, & Ramette A (2014) Bacterial taxa–area and distance–decay relationships in marine environments. *Mol Ecol* 23(4):954-964.
42. Fruchterman TMJ & Reingold EM (1991) Graph drawing by force-directed placement. *Software Pract Exper* 21(11):1129-1164.
43. Oksanen J, *et al.* (2012) *vegan: Community Ecology Package*.
44. Roberts DW (2012) *labdsv: Ordination and Multivariate Analysis for Ecology*.
45. Magnusson A (2011) *Interface between GMT Map-Making Software and R*.
46. Butts CT, Handcock MS, & Hunter DR (2007) *Network: classes for relational data*.
47. Schreiber L, Holler T, Knittel K, Meyerdierks A, & Amann R (2010) Identification of the dominant sulfate-reducing bacterial partner of anaerobic methanotrophs of the ANME-2 clade. *Environ Microbiol* 12(8):2327-2340.
48. Kleindienst S, Ramette A, Amann R, & Knittel K (2012) Distribution and in situ abundance of sulfate-reducing bacteria in diverse marine hydrocarbon seep sediments. *Environ Microbiol* 14(10):2689-2710.
49. Holler T, *et al.* (2011) Thermophilic anaerobic oxidation of methane by marine microbial consortia. *ISME J* 5(12):1946-1956.
50. Quast C, *et al.* (2013) The SILVA ribosomal RNA gene database project: improved data processing and web-based tools. *Nucleic Acids Res* 41(D1):D590-D596.

51. Pop Ristova P, *et al.* (2012) Bacterial diversity and biogeochemistry of different chemosynthetic habitats of the REGAB cold seep (West African margin, 3160 m water depth). *Biogeosciences* 9(12):5031-5048.
52. Lloyd KG, Alperin MJ, & Teske A (2011) Environmental evidence for net methane production and oxidation in putative ANaerobic MEthanotrophic (ANME) archaea. *Environ Microbiol* 13(9):2548-2564.
53. Sommer S, Linke P, Pfannkuche O, Niemann H, & Treude T (2010) Benthic respiration in a seep habitat dominated by dense beds of ampharetid polychaetes at the Hikurangi Margin (New Zealand). *Mar Geol* 272(1-4):223-232.
54. Lloyd KG, *et al.* (2010) Spatial Structure and Activity of Sedimentary Microbial Communities Underlying a *Beggiatoa* spp. Mat in a Gulf of Mexico Hydrocarbon Seep. *PLoS ONE* 5(1):e8738.
55. Lichtschlag A, Felden J, Brüchert V, Boetius A, & de Beer D (2010) Geochemical processes and chemosynthetic primary production in different thiotrophic mats of the Haakon Mosby Mud Volcano (Barents Sea). *Limnol Oceanogr* 55(2):931-949.
56. Grünke S, *et al.* (2010) Novel observations of Thiobacterium, a sulfur-storing Gammaproteobacterium producing gelatinous mats. *ISME J* 4(8):1031-1043.
57. Aquilina A, *et al.* (2010) Biomarker indicators for anaerobic oxidizers of methane in brackish-marine sediments with diffusive methane fluxes. *Org Geochem* 41(4):414-426.
58. Niemann H, *et al.* (2009) Biogeochemistry of a low-activity cold seep in the Larsen B area, western Weddell Sea, Antarctica. *Biogeosciences* 6(11):2383-2395.
59. Wegener G, *et al.* (2008) Biogeochemical processes and microbial diversity of the Gullfaks and Tommeliten methane seeps (Northern North Sea). *Biogeosciences* 5(4):1127-1144.
60. Knittel K, Lösekann T, Boetius A, Kort R, & Amann R (2005) Diversity and Distribution of Methanotrophic Archaea at Cold Seeps. *Appl Environ Microbiol* 71(1):467-479.
61. Longhurst A, Sathyendranath S, Platt T, & Caverhill C (1995) An estimate of global primary production in the ocean from satellite radiometer data. *J Plank Res* 17(6):1245-1271.
